# Supplementary material
Source: publisher figshare collection journal article supplement (https://acs.figshare.com/ndownloader/files/14732411)
Supplement: Supplementary file 1 [file 14732411]

## Sheet: 工作表1
Table S3: List of quantitative HNE-peptides in MHCC-97H lysates to verify the reproducibility of SiLAP strategy.
Seq	Run 1-127/126	Run 2-127/126	Run 3-127/126	SD	Run 1-128/126	Run 2-128/126	Run 3-128/126	SD	Run 1-129/126	Run 2-129/126	Run 3-129/126	SD	Run 1-130/126	Run 2-130/126	Run 3-130/126	SD	Run 1-131/126	Run 2-131/126	Run 3-131/126	SD
YKPAVNQIEchPYLTQEK-P15121-C10(ywj); H11(ywj)	0.874	1.111	1.118	0.138897	0.648	0.825	0.708	0.0900167	0.831	0.952	1.013	0.0926337	0.684	0.764	0.665	0.0525389	0.694	0.768	0.73	0.0370045
EAEAAIYhLQLFEELR-P14618-H8(ywj)	1.056	0.81	0.897	0.124744	0.772	1.242	1.028	0.235313	0.749	1.215	1.128	0.247779	0.798	1.174	1.129	0.20533	0.869	1.265	0.934	0.212368
FhDFLGDSWGILFSHPR-P30041-H2(ywj)	1.098	0.73	1.036	0.197021	1.075	1.076	1.107	0.0181934	1.269	1.285	1.204	0.0428991	1.018	1.303	0.993	0.172216	1.051	1.08	0.905	0.0937923
HIDcAHVYQNENEVGVAIQEK-P15121-C4(ywj)	0.814	0.786	1.532	0.422852	0.831	0.616	0.454	0.18912	0.919	0.917	0.924	0.00360555	0.877	0.835	1.148	0.169889	1.136	0.937	0.856	0.144084
AFhNEAQVNPER-P17987-H3(ywj)	0.838	0.718	1.196	0.248679	1.075	0.778	1.328	0.275293	0.915	0.866	1.138	0.144979	0.865	0.984	1.015	0.0791854	1.046	0.941	1.186	0.122916
VcALLScTShK-P15121-C2(ywj); C7(ywj); H10(ywj)	1.153	1.016	1.033	0.0746749	0.911	0.693	0.682	0.129155	1.201	1.104	1.125	0.0510327	1.283	1.057	1.165	0.113037	0.783	0.531	0.785	0.146073
SSPPVVDTVhGK-P23141-H10(ywj)	1.048	1.419	0.674	0.372501	0.991	1.035	1.112	0.0612454	0.947	1.156	0.981	0.112147	0.877	1.068	0.854	0.117478	1.021	1.106	0.96	0.073328
VVDLMAh-P04406-H7(ywj)	1.115	1.153	1.252	0.0707272	0.988	1.116	0.806	0.155782	1.03	1.001	0.787	0.132719	0.96	0.92	0.962	0.0236925	1.093	1.128	0.993	0.0700595
NIDEhANEDVER-P61026-H5(ywj)	1.095	0.791	0.948	0.152027	1.037	0.951	1.053	0.0548574	1.169	1	0.843	0.163037	0.928	1.072	0.859	0.108678	1.258	1.615	1.423	0.17867
McNEFFEGFPDK-P26447-C2(ywj)	0.98	1.05	0.989	0.0380832	0.996	1.018	0.949	0.0352467	0.993	0.961	0.967	0.0170098	0.969	0.829	0.865	0.0727003	1.071	1.039	0.962	0.0560268
EIQVQhPAAK-P49368-H6(ywj)	1.438	1.011	1.096	0.226023	1.327	1.109	0.912	0.207589	1.256	0.917	0.848	0.218383	1.041	0.757	1.008	0.15532	1.625	1.494	1.118	0.263181
NIhEScMSQIGWNR-P11413-H3(ywj); C6(Carbamidomethyl)	0.962	1.049	1.161	0.0997614	0.719	1.127	1.102	0.228684	1.008	1.09	1.185	0.0885795	0.75	1.054	1.078	0.182837	1.184	1.483	1.153	0.182237
IGGVILFhETLYQK-P04075-H8(ywj)	0.827	1.034	1.037	0.120387	0.788	0.745	0.8	0.0289194	1.14	1.095	1.022	0.0595511	0.949	1.174	1.023	0.114675	0.87	1.222	0.866	0.204392
IISNAScTTN-P04406-C7(ywj)	0.93	0.614	1.003	0.206763	0.698	1.039	0.911	0.172257	1.135	0.775	0.85	0.189934	0.722	0.756	0.82	0.0497594	0.961	0.772	0.958	0.108264
HIDcAYVYQNEHEVGEAIQEK-O60218-C4(ywj)	0.756	0.984	0.751	0.133103	0.834	0.841	0.783	0.0316596	1.042	1.046	0.968	0.0439242	0.965	1.103	0.916	0.0969656	0.768	0.886	0.755	0.0721734
AIANEcQAN-P55072-C6(ywj)	0.919	1.223	0.461	0.383585	0.852	1.041	0.837	0.113697	0.815	1.185	0.811	0.214784	0.892	1.056	0.866	0.103015	0.874	1.358	0.851	0.286308
LTLYDIAhTPGVAADLSHIETK-P40926-H8(ywj)	1.014	0.798	1.04	0.132851	0.842	0.901	0.864	0.0298161	0.981	0.872	1.017	0.0755006	0.894	0.756	0.98	0.113001	0.87	1.001	1.109	0.119684
VVDLMAhMASK-P04406-H7(ywj)	1.04	1.108	1.143	0.0523737	0.918	0.958	0.908	0.0264575	0.913	0.858	0.911	0.0311929	0.821	0.799	0.843	0.022	0.984	1.058	1.085	0.0522909
NLLhVTDTGVGMTR-P14625-H4(ywj)	1.352	0.85	1.128	0.251484	1.03	0.798	0.86	0.120117	1.045	0.58	0.792	0.232801	1.042	0.932	0.843	0.0996845	1.06	0.82	0.968	0.121084
FSGDLDDQTcR-P05455-C10(ywj)	0.851	1.043	1.022	0.105314	1.11	1.108	1.056	0.0306159	1.026	1.061	0.824	0.127931	0.846	0.769	0.783	0.0410163	0.942	1.118	1.048	0.0886115
ALEhFTDLYDIK-Q00610-H4(ywj)	1.042	1.047	1.216	0.0990471	0.937	1.085	1.096	0.0887938	0.92	0.896	1.131	0.129307	1.083	0.945	0.953	0.0774683	0.956	0.926	1.031	0.0540833
hIDCAYVYQNEhEVGEAIQEK-O60218-H1(ywj); H12(ywj)	0.962	0.901	0.857	0.0527289	1.055	0.933	1.058	0.0713185	1.035	0.917	1.001	0.0607399	0.842	0.918	1.041	0.100421	0.963	0.916	1.132	0.113597
TTTSAVMVhcLR-P23141-H9(ywj); C10(Carbamidomethyl)	1.188	0.473	1.467	0.512689	1.029	0.889	1.044	0.0854888	0.867	0.764	0.979	0.107531	0.862	0.775	1.037	0.13344	0.895	1.783	1.258	0.446456
HEPIGVcGQIIPWNFPLVmLIWK-P00352-C7(ywj); M19(Oxidation)	0.488	0.784	1.001	0.257512	0.828	1.158	0.957	0.166304	0.981	0.992	1.165	0.103204	1.573	1.481	1.136	0.230383	0.442	0.984	0.833	0.279716
ITVVGVGAVGMAcAISILMK-P00338-C13(ywj)	0.897	1.237	0.499	0.36938	0.958	1.148	0.87	0.142084	1.126	1.103	1.024	0.0535008	1.194	1.423	1.324	0.114849	0.908	1.033	0.955	0.0631374
FQSSAVMALQEASEAYLVGLFEDTNLcAIH-Q71DI3-C27(ywj)	0.529	0.768	0.816	0.153728	0.943	1.25	1.324	0.202026	1.134	0.67	1.206	0.290911	1.274	1.454	1.524	0.12897	0.752	0.689	1.12	0.232792
TATPQQAQEVhEK-P60174-H11(ywj)	0.795	1.083	0.974	0.145411	0.983	0.829	1.654	0.438669	0.892	0.803	0.927	0.0639296	0.74	0.757	0.868	0.069515	1.046	1.061	1.2	0.0849137
YESLELcR-Q00610-C7(ywj)	1.138	1.196	1.205	0.0363639	1.011	1.158	1.029	0.080181	0.975	1.05	1.03	0.0388373	0.929	1.045	1.018	0.0606987	1.116	1.233	1.237	0.0687338
VAQDLcK-P13804-C6(ywj)	1.093	1.201	0.821	0.195809	0.96	1.081	0.976	0.0657292	0.961	0.991	0.992	0.0176163	0.845	0.957	0.891	0.0562968	1.175	1.15	1.14	0.0180278
WLSLPLFEAFAQhVLNR-Q969Z0-H13(ywj)	1.685	1.092	1.326	0.298688	1.172	1.065	1.111	0.0536749	2.093	1.235	1.719	0.430174	2.011	1.099	1.918	0.501856	1.199	1.113	1.93	0.448933
STAGDThLGGEDFDNR-P11142-H7(ywj)	1.119	1.04	0.925	0.0975551	1.184	1.151	0.906	0.151876	0.818	1.044	0.917	0.113289	0.8	0.816	0.814	0.0087178	1.108	0.935	1.159	0.117407
FGEENIEVYhSYFWPLEWTIPSR-Q16881-H10(ywj)	1.217	0.863	0.716	0.257529	1.235	0.62	1.083	0.320338	1.044	0.951	1.099	0.0748086	1.209	0.862	1.084	0.175745	0.991	0.738	1.036	0.160643
MVTPGhAcTQK-P04075-H6(ywj); C8(Carbamidomethyl)	1.179	0.724	1.24	0.281958	1.053	0.726	1.033	0.183293	1.015	0.587	1.001	0.243165	0.908	0.753	0.921	0.0934684	1.127	0.753	1.186	0.234821
VVSGMVNcNDDQGVLLGR-P21980-C8(ywj)	0.834	1.111	1.142	0.169585	0.882	0.984	1.382	0.264199	0.842	1.226	1.088	0.194515	0.997	1.162	1.014	0.0907542	0.921	1.349	1.402	0.26374
hHAISAK-P27824-H1(ywj)	1.298	1.053	1.65	0.300094	1.115	0.914	0.967	0.104175	0.921	0.74	0.901	0.0992321	1.381	0.885	1.108	0.24842	1.466	0.895	1.198	0.285679
FhVEEEGK-P00558-H2(ywj)	0.978	1.224	0.965	0.145926	0.993	1.125	1.212	0.110268	0.858	0.921	0.748	0.0875576	0.655	0.845	0.52	0.163274	1.176	1.012	1.127	0.0841843
VFIMDNcEELIPEYLNFIR-P07900-C7(ywj)	1.3	0.792	0.928	0.262978	1.164	1.113	1.04	0.0623244	0.927	1.011	1.164	0.120162	1.186	1.278	0.924	0.183677	1.167	0.986	0.913	0.130771
FNAHGDANTIVcNSK-P09382-C12(ywj)	1.405	0.937	1.136	0.234871	1.032	1.146	1.051	0.0610765	0.989	1.124	0.979	0.0809835	0.986	1.037	1.052	0.0345977	0.926	1.179	1.128	0.1338
TGSQGQcTQVR-P62857-C7(ywj)	1.079	1.037	1.326	0.156148	1.247	1.187	1.082	0.0835165	0.873	0.824	1.011	0.0969656	0.818	0.839	0.905	0.0453982	1.189	1.162	1.032	0.0839424
SDGFSIETcK-P17655-C9(ywj)	1.026	1.203	1.271	0.126477	1.077	1.035	1.198	0.0846306	1.049	0.82	1.007	0.121911	0.868	0.958	1.079	0.105879	1.314	0.922	0.975	0.212679
hGVYNPNK-P40926-H1(ywj)	1.032	1.253	1.119	0.11133	0.949	0.811	1.07	0.129593	0.779	0.803	0.79	0.0120139	0.642	0.736	0.782	0.0713583	1.084	1.059	1.093	0.0176163
AhMGMFTELAILYSK-Q00610-H2(ywj)	1.112	0.982	0.961	0.0817945	0.871	0.865	0.921	0.0307463	1.062	0.955	1.091	0.071631	1.222	0.946	1.273	0.175929	0.83	0.613	0.701	0.109144
YDDMATcMK-P27348-C7(ywj)	1.309	1.227	1.04	0.137873	1.181	1.118	0.901	0.146889	1.002	1.006	0.858	0.0843169	0.996	0.921	0.833	0.0815864	1.164	1.077	1.029	0.0684324
GTDIMYTGTLDcWR-P05141-C12(ywj)	1.211	1.023	0.901	0.156167	0.997	0.977	0.945	0.0262298	0.986	1.046	0.954	0.0467047	0.927	0.987	0.859	0.0640417	0.998	0.969	0.834	0.0875233
ELGEYGFhEYTEVK-P00352-H8(ywj)	1.122	1.082	0.882	0.128582	1.024	1.287	0.876	0.208164	0.842	0.97	1.118	0.138121	0.9	1.045	0.896	0.0848941	0.926	1.233	0.875	0.193655
DVLNLVYLcEALNLPEVAR-O60701-C9(ywj)	1.069	0.972	1.05	0.0514036	0.791	1.043	0.977	0.130675	0.958	1.18	1.319	0.182083	1.005	1.169	1.434	0.216472	1.01	0.776	1.081	0.159594
GFcFITFK-Q14103-C3(ywj)	0.906	1.117	1.218	0.159199	1.102	0.991	1.102	0.0640859	1.217	1.182	1.158	0.0296704	1.192	1.169	1.252	0.0428525	1	1.135	1.097	0.0696156
LVSSPccIVTSTYGWTANMER-P08238-C6(ywj); C7(ywj)	0.839	0.588	0.931	0.177536	0.861	0.786	0.964	0.0893663	1.068	1.148	1.293	0.114054	1.149	1.148	1.338	0.109409	0.766	0.79	0.859	0.0482804
hNQLPLVIEFTEQTAPK-P07237-H1(ywj)	1.661	1.011	1.061	0.361709	1.405	1.099	1.157	0.162534	1.421	1.005	0.934	0.26308	1.632	1.046	0.995	0.353969	1.246	0.857	0.925	0.20776
ETAENYLGhTAK-P38646-H9(ywj)	0.833	1.048	1.137	0.156291	0.954	1.008	0.788	0.114653	0.872	0.902	0.944	0.0361663	0.793	0.877	0.967	0.0870172	1.03	1.119	1.052	0.0463573
YKPVTNQVEchPY-O60218-C10(Carbamidomethyl); H11(ywj)	0.837	1.641	1.64	0.463901	0.94	1.115	2.687	0.9621	0.905	0.725	1.427	0.36462	0.618	1.085	0.895	0.234847	1.103	1.026	1.874	0.468948
ATcAPQHGAPGPGPADASK-P21333-C3(ywj)	0.985	1.29	0.937	0.191458	0.864	1.088	0.864	0.129326	0.896	1.075	0.867	0.112654	0.855	0.872	0.56	0.175432	0.883	0.973	0.961	0.0488672
hLHYWFVESQK-P10619-H1(ywj)	0.802	1.329	1.024	0.264587	0.788	1.047	0.978	0.134128	0.983	1.054	1.1	0.0589435	1.041	1.064	0.81	0.140479	0.961	0.946	0.937	0.0121244
GAGTGGLGLTVEGPcEAK-O75369-C15(ywj)	1.108	0.898	1.418	0.261598	0.878	1.108	1.282	0.202646	1.072	0.847	1.207	0.181865	0.88	1.007	1.256	0.19127	0.939	1.188	1.405	0.233183
FEELcSDLFR-P08107-C5(ywj)	1.09	1.088	1.055	0.0196554	1.055	1.171	1.084	0.0603683	0.915	0.94	1.03	0.0604842	0.807	1.016	0.963	0.108648	1.132	1.149	1.04	0.058643
FGANAILGVSLAVcK-P06733-C14(ywj)	0.685	0.729	0.875	0.0994585	0.97	1.164	0.9	0.136767	0.887	1.129	1.029	0.121606	1.156	1.285	1.16	0.0733508	0.952	0.949	0.832	0.0684324
DNEVDFQEYcVFLScIAM-P26447-C10(ywj); C15(ywj)	0.696	0.712	0.807	0.0600028	0.955	0.808	1.004	0.102002	0.852	0.83	0.832	0.0121655	0.955	1.039	1.028	0.0456545	1.133	1.028	0.939	0.0971099
TLGEcGFTSQTAR-Q15370-C5(ywj)	0.847	0.888	1.108	0.140358	0.906	0.88	0.993	0.0591805	0.694	0.752	0.985	0.154021	0.717	0.706	1.008	0.171273	0.987	0.875	1.029	0.0796074
YVTIIDAPGhR-P68104-H10(ywj)	0.994	1.14	1.141	0.0845833	1.042	1.029	0.954	0.0475009	0.861	0.965	0.96	0.0586544	0.912	0.857	0.922	0.035	1.096	1.011	1.102	0.0508953
hIYYITGETK-P07900-H1(ywj)	1.233	1.003	1.21	0.126674	0.931	0.907	0.816	0.0606658	0.935	0.962	0.991	0.028006	0.971	0.791	0.898	0.0905336	0.946	0.833	0.956	0.0683106
QYDADLEQILIQWITTQcR-P37802-C18(ywj)	0.823	0.555	1.855	0.686397	1.087	0.981	1.422	0.230196	1.23	0.942	0.933	0.168935	1.249	1.25	1.504	0.146936	0.946	1.016	1.723	0.429821
cIESLIAVFQK-P31949-C1(ywj)	1.035	1.133	0.951	0.0910897	1.054	1.236	1.128	0.0915278	1.107	1.297	1.244	0.0980459	1.19	1.306	1.292	0.0633193	1.023	1.165	1.094	0.071
ALSSQhQAR-P11021-H6(ywj)	1.294	1.026	1.124	0.135602	1.047	0.949	1.038	0.0541695	0.931	0.774	0.988	0.110826	0.875	0.841	0.807	0.034	0.98	0.815	0.979	0.0949754
TVVTGIEMFhK-P49411-H10(ywj)	0.905	1.413	1.152	0.254032	0.807	1.172	1.187	0.215194	0.971	1.234	1.161	0.135768	0.942	1.082	1.176	0.117751	1.008	1.158	1.264	0.128629
ADhGEPIGR-P08238-H3(ywj)	1.257	1.085	1.233	0.0931522	1.024	0.964	1.007	0.0309246	0.787	0.923	0.88	0.069515	0.789	0.827	0.86	0.0355293	1.126	1.054	0.988	0.0690217
VShVSTGGGASLELLEGK-P00558-H3(ywj)	1.312	1.079	1.13	0.122484	1.006	0.806	1.08	0.141746	1.093	0.996	0.906	0.0935218	0.883	1.043	1.119	0.120466	1.068	1.187	1.46	0.200978
MVNhFIAEFK-P11142-H4(ywj)	0.989	1.151	1.172	0.100145	0.956	1.146	1.137	0.107193	0.943	0.962	1.086	0.0776595	1.004	0.897	0.959	0.0537246	0.957	1.11	1	0.0789071
NAQLNIELEAAHh-P43490-H13(ywj)	1.083	1.157	1.033	0.0623859	1.08	1.021	0.998	0.0422966	0.918	0.919	0.888	0.0176163	0.886	0.882	0.848	0.0208806	1.046	1.14	1.062	0.0502925
AVEKPPQTEhIEL-P23141-H10(ywj)	1.156	1.201	0.87	0.179528	1.167	1.02	1.001	0.0908534	1.075	0.81	0.795	0.157507	1.085	0.88	0.822	0.138177	1.462	0.808	1.042	0.331379
ELNNTcEPVVTQPK-Q92598-C6(ywj)	1.458	1.533	1.145	0.205807	0.96	1.093	1.3	0.171337	1.047	1.014	0.827	0.118644	0.669	0.912	0.902	0.1375	0.664	1.185	0.655	0.303431
MFQYDSThGK-P04406-H8(ywj)	0.993	1.107	1.345	0.179603	0.973	1.031	0.884	0.0740428	0.828	0.894	0.926	0.0499733	0.747	0.83	0.851	0.0549939	1.161	1.112	1.122	0.0258908
DYVFIEFcVEDSK-Q15185-C8(ywj)	0.749	0.646	0.681	0.0523737	1.101	1.02	1.13	0.0570117	1.042	1.085	0.977	0.0543722	1.188	1.126	1.093	0.0482321	0.999	0.997	1.068	0.0404269
ELSDIAhR-P04075-H7(ywj)	1.082	1.17	1.148	0.0457967	1.052	1.12	1.01	0.0555098	0.849	0.942	1.004	0.078015	0.799	0.815	0.774	0.020664	1.03	1.207	1.121	0.0885118
LNcQVIGASVDSHFcHLAWVNTPK-Q06830-C3(ywj); C15(Carbamidomethyl)	0.607	0.846	0.8	0.126811	0.9	0.903	0.927	0.0147986	0.804	1.012	0.962	0.108573	1.001	1.073	1.222	0.112714	0.894	0.865	0.879	0.0145029
GVSSQETAGIGASAhLVNFK-P43490-H15(ywj)	0.899	1.021	1.118	0.109738	1.02	0.788	0.821	0.125508	1.042	0.879	1.13	0.127354	1.004	0.834	0.871	0.0894036	0.873	0.896	1.149	0.153142
GDLEEYGQDLLhTVFK-P43490-H12(ywj)	1.014	1.421	1.011	0.235852	1.002	1.162	1.448	0.225947	1.064	1.498	1.595	0.282762	1.212	1.141	0.934	0.144438	0.819	1.387	1.456	0.34956
NTGIIcTIGPASR-P14618-C6(ywj)	0.992	0.954	1.009	0.0281603	0.845	0.817	0.782	0.0315647	0.973	0.998	0.97	0.0153731	0.932	0.829	0.89	0.0517912	0.895	0.91	0.889	0.0108167
SDEGhPFR-Q9NQC3-H5(ywj)	1.057	1.128	0.888	0.12329	1.026	1.09	0.875	0.110395	0.853	0.971	0.889	0.0604759	0.747	0.847	0.691	0.0790274	0.926	1.033	1.035	0.0623618
ELNLDQFhDK-P27824-H8(ywj)	1.194	0.925	1.145	0.143272	1.448	0.929	1.014	0.278371	1.088	0.857	1.04	0.121897	0.866	0.966	0.926	0.0503322	1.315	0.864	1.161	0.229247
hGLEVIYMIEPIDEYcVQQLK-P07900-H1(ywj); C16(ywj)	0.769	1.038	0.89	0.134726	0.906	0.895	0.841	0.0347898	1.202	1.051	0.91	0.146029	1.035	1.029	1.01	0.0130512	0.922	0.962	0.826	0.0698952
AFQYVETHGEVcPANWTPDSPTIKPSPAASK-P30048-C12(ywj)	0.841	1.244	1.145	0.21001	0.672	1.236	1.158	0.305608	1.049	1.105	1.138	0.0449926	0.667	1.022	0.923	0.183195	0.665	1.145	1.29	0.327121
TSAVPSPcGK-P49748-C8(ywj)	1.04	1.284	1.207	0.124736	0.928	0.994	1.118	0.0964642	0.891	0.809	0.826	0.0432782	0.914	0.944	0.779	0.087892	0.828	0.933	0.914	0.0559494
YSNVIFLEVDVDDcQDVASEcEVK-P10599-C14(ywj); C21(ywj)	0.554	0.734	0.606	0.0926355	0.905	1.087	1.032	0.0933435	0.787	0.845	0.796	0.0312143	0.992	1.12	0.984	0.0763151	0.925	1.012	0.832	0.0900167
KFPVFNPATEEELcQVEEGDKEDVDK-P00352-C14(ywj)	0.966	0.915	0.894	0.037027	1.226	1.425	1.046	0.189579	1.007	1.005	1.05	0.0254231	0.855	0.916	0.811	0.0527289	0.92	1.092	1.061	0.0916752
KLEEEQIILEDQNcK-P35579-C14(ywj)	0.905	1.16	1.012	0.128048	0.748	0.787	0.952	0.108291	0.629	0.58	0.751	0.0880587	0.567	0.881	0.779	0.160179	1.034	1.001	0.944	0.0455302
VShLLGINVTDFTR-P35579-H3(ywj)	1.082	0.928	0.981	0.0782368	0.865	0.61	0.934	0.170666	1.14	0.717	1.074	0.227572	0.921	0.691	0.983	0.153844	0.919	0.638	1.003	0.191155
ALDLDSScK-P31948-C8(ywj)	1.17	1.219	1.068	0.0770346	1.025	0.987	0.947	0.0390043	0.822	0.928	0.84	0.0567215	0.792	0.968	0.905	0.0891759	1.076	1.255	1.111	0.0948701
IFINNEWhDSVSGK-P00352-H8(ywj)	0.884	1.283	1.171	0.205797	0.947	1.024	1.077	0.0653682	0.807	0.941	1.025	0.109952	0.665	0.909	1.086	0.211387	1.076	1.315	0.871	0.222217
VNPLSLVEIILhVVR-Q9UNM6-H12(ywj)	1.13	1.5	1.012	0.254613	0.995	1.8	1.023	0.456899	0.986	2.072	0.489	0.809557	0.751	1.506	0.585	0.490887	1.138	1.457	0.394	0.545476
YKPVTNQVEchPYLTQEK-O60218-C10(ywj); H11(ywj)	0.991	1.17	1.128	0.0936073	0.676	0.67	0.742	0.03995	0.98	1.034	0.989	0.028931	0.745	0.901	0.8	0.0791223	0.928	0.961	1.02	0.0466083
hEMLPASLIQAQR-P52209-H1(ywj)	1.167	0.934	0.928	0.136288	0.883	0.849	0.891	0.022301	0.85	0.864	0.701	0.0903383	0.831	0.803	0.82	0.0141067	0.971	1.017	0.883	0.0680882
NAFAcFDEEATGTIQEDYLR-P19105-C5(ywj)	0.672	0.524	0.858	0.16736	0.949	0.843	1.073	0.115117	0.947	0.853	1.22	0.190637	0.747	0.99	1.209	0.231104	0.791	0.852	0.758	0.04769
VGSSGDIALhINPR-P56470-H10(ywj)	1.154	0.989	1.128	0.0887149	1.19	0.961	1.033	0.1171	0.759	0.806	1.022	0.140258	0.974	0.819	0.937	0.0809506	1.149	0.988	1.587	0.309991
AGKPhLVLGLLWQIIK-P13797-H5(ywj)	1.055	0.857	1.042	0.110753	1.34	1.018	0.791	0.275867	1.342	1.262	0.753	0.319479	1.132	1.128	1.134	0.00305505	1.16	1.084	1.029	0.0657799
AVGIDLGTTYScVGVFQHGK-P11142-C12(ywj)	1.015	0.994	0.886	0.069217	0.9	1.062	0.792	0.135897	0.956	1.047	1.064	0.0580718	1.058	1.189	1.108	0.0661085	0.722	1.078	0.796	0.187855
SIcDTSNFSDYIR-P22314-C3(ywj)	1.091	0.911	0.535	0.283699	0.921	0.815	0.956	0.0734189	1.257	0.901	0.81	0.236229	1.079	1.028	1.02	0.0320052	1.05	0.871	0.763	0.144956
LYcIYVAIGQK-P25705-C3(ywj)	1.033	0.907	0.98	0.063264	1.073	0.977	1.149	0.0861936	1.033	0.9	1.206	0.153435	1.027	1.08	1.311	0.151011	1.062	0.918	1.07	0.0855414
LLGHWEEAAHDLALAcK-P50502-C16(ywj)	1.001	0.836	1.059	0.115699	0.847	0.948	0.947	0.0580259	1.113	0.927	0.941	0.103582	0.932	1.056	0.807	0.1245	1.038	0.528	0.629	0.270056
AcHDSFLK-P31949-C2(ywj)	1.077	1.203	1.016	0.0953642	0.707	0.729	0.742	0.0176918	0.836	0.81	0.906	0.0496521	0.859	0.791	0.868	0.0420991	0.88	0.91	0.92	0.0208167
ILDWhVANTDK-P37837-H5(ywj)	0.933	1.376	0.865	0.277487	1.174	1.218	0.829	0.213027	0.882	1.037	0.732	0.152507	0.886	0.889	0.644	0.140593	1.148	1.258	0.919	0.172946
LTIcGWDFGFR-P08581-C4(ywj)	1.144	1.184	1.065	0.0605558	1.082	1.237	0.911	0.163065	1.474	1.492	1.229	0.146923	1.463	1.338	1.168	0.148071	1.039	1.078	1.021	0.0291376
hYcDSEKPR-Q9UGI8-H1(ywj); C3(Carbamidomethyl)	0.802	1.089	1.454	0.326777	0.952	0.882	1.144	0.135652	0.876	1.132	1.006	0.128005	0.881	0.813	0.907	0.0485386	0.809	1.002	1.384	0.292631
ITVVGVGQVGMAcAISILGK-P07195-C13(ywj)	0.791	0.66	0.73	0.0655515	0.986	1.114	1.019	0.0664555	1.21	1.012	1.133	0.0998115	1.479	1.265	1.429	0.111946	1.201	0.827	0.838	0.212825
LDTNSDGQLDFSEFLNLIGGLAMAcHDSFLK-P31949-C25(ywj)	0.82	0.858	0.841	0.0190351	1.082	1.276	0.73	0.276784	1.521	1.484	1.09	0.238874	1.215	1.423	1.062	0.181197	1.035	0.969	1.001	0.0330051
LLYDLADQLhAAVGASR-P13804-H10(ywj)	1.11	1.012	0.88	0.115418	1.212	1.227	1.129	0.0527857	1.32	1.162	1.081	0.12155	1.32	1.074	1	0.167527	0.954	0.977	0.867	0.0580201
SYLYQILQGIVFcHSR-P06493-C13(ywj)	0.796	0.914	0.97	0.0888219	0.626	1.357	0.673	0.409151	0.732	0.95	1.044	0.160054	1.263	1.388	0.937	0.232845	0.838	0.701	1.03	0.165264
GEMMDLQhGSLFLR-P00338-H8(ywj)	0.922	1.067	0.904	0.0893663	1.01	0.974	0.938	0.036	0.901	0.993	0.935	0.0465188	0.892	0.807	0.968	0.0805419	0.936	0.96	0.947	0.0120139
GLYDGPVcEVSVTPK-Q16555-C8(ywj)	1.025	0.889	1.037	0.082203	1.024	0.998	0.832	0.10416	1.031	0.753	0.835	0.142843	0.989	0.917	0.738	0.129245	1.023	0.896	1.062	0.0868005
INALTAASEAAcLIVSVDETIK-Q99832-C12(ywj)	0.643	1.132	0.646	0.281462	1.402	0.996	1.13	0.206872	1.055	1.536	1.274	0.24082	1.274	1.713	1.263	0.256691	0.862	1.229	0.657	0.289798
AADcGQLEILEFLLLK-P58546-C4(ywj)	0.458	0.86	0.571	0.207322	1.032	0.949	0.992	0.041509	0.979	1.097	1.614	0.337747	1.093	1.108	1.519	0.241737	0.811	0.865	0.6	0.140037
LMEEcK-Q9P0L0-C5(ywj)	1.132	1.032	1.179	0.0750755	0.87	1.13	1.054	0.133686	0.911	0.94	0.907	0.0180093	0.894	0.866	0.863	0.0170978	1.202	1.174	1.129	0.0368284
GAhSVGLMWWMLAR-P08865-H3(ywj)	0.946	1.047	1.035	0.0551755	1.017	1.2	1.181	0.10062	0.965	1.166	1.177	0.11935	1.127	1.463	1.431	0.185444	1.193	1.223	0.919	0.167527
FSGWYDADLSPAGhEEAK-P18669-H14(ywj)	0.848	1.651	1.153	0.405347	0.815	1.325	1.021	0.256564	0.972	1.394	0.911	0.263025	0.99	1.29	0.753	0.269115	0.925	1.233	1.301	0.20036
DAPEEEDhVLVLR-P07237-H8(ywj)	0.942	0.906	0.904	0.0213854	0.953	0.85	0.923	0.0529748	0.869	0.9	0.78	0.0622923	0.845	0.823	0.929	0.0559404	0.956	1.054	1.068	0.0610246
IFTPLLhQIELEKPKPIPY-P11413-H7(ywj)	0.602	0.681	0.906	0.157735	1.127	0.796	1.186	0.210215	0.817	0.799	1.3	0.284199	0.941	0.972	1.172	0.125381	1.289	0.75	1.331	0.323997
DWQGFLELYLQNSPEAcDYGL-P78417-C17(ywj)	0.921	1.247	1.216	0.179936	1.061	1.405	1.252	0.172349	1.231	1.417	0.997	0.210457	1.28	1.262	1.125	0.0847722	1.193	1.193	0.856	0.194567
IIPGFMcQGGDFTR-P62937-C7(ywj)	1.111	1.014	0.911	0.100015	0.828	0.859	0.952	0.0645316	0.956	1.096	0.966	0.0781025	0.895	1.024	0.983	0.0659116	0.924	0.894	0.903	0.0153948
WFLTcINQPQFR-P26641-C5(ywj)	0.798	0.976	1.055	0.13164	1.037	1.032	0.934	0.0580775	1.028	1.057	1.281	0.138459	1.032	1.2	1.297	0.134076	0.809	1.039	0.969	0.117898
VMTMIPDVDcLLWAIGR-P00390-C10(ywj)	0.662	1.016	1	0.199923	1.083	1.043	0.802	0.15201	0.995	1.292	1.566	0.285577	1.019	1.136	1.129	0.0656227	0.589	1.167	0.869	0.289047
LYSNAYLNDLAGcIK-P00352-C13(ywj)	0.901	0.921	1.135	0.129713	0.846	0.957	1.153	0.155449	0.968	0.991	1.078	0.0580201	0.889	0.996	0.977	0.0570877	0.956	0.915	1.063	0.0764133
VVDLMAhM-P04406-H7(ywj)	1.062	1.166	1.263	0.10052	0.929	0.838	1.062	0.112654	0.902	0.837	1.105	0.139796	0.811	0.705	0.996	0.147276	1.029	1.072	1.382	0.192595
WNSPAEEGSSDcEVFSK-P34932-C12(ywj)	1.041	1.05	0.9	0.0841249	0.958	0.983	0.819	0.0883572	0.877	0.819	0.953	0.0672012	0.912	0.872	0.87	0.0236925	1.009	1.036	0.636	0.223554
EILGTAQSVGcNVDGR-P30050-C11(ywj)	0.904	0.688	1.003	0.161081	0.919	0.979	0.805	0.0883855	1.201	0.93	0.905	0.164155	1.132	0.804	0.838	0.180359	1.163	0.96	1.057	0.101533
LNcQVIGASVDSHFchLAWVNTPK-Q06830-C3(Carbamidomethyl); C15(Carbamidomethyl); H16(ywj)	0.604	0.867	0.933	0.174053	0.62	0.847	0.873	0.139173	1.061	0.807	0.873	0.131793	1.037	0.939	1.059	0.0638853	0.747	0.626	0.72	0.0635164
AcANPAAGSVILLENLR-P00558-C2(ywj)	0.813	0.779	1.072	0.160253	0.871	0.874	1.146	0.157912	1.026	0.864	1.323	0.232785	1.216	0.922	1.293	0.195792	0.85	0.858	0.948	0.0544181
NVDLLSDMVQEhDEPILK-P55209-H12(ywj)	0.877	0.98	0.773	0.1035	1.12	1.192	1.116	0.0427707	0.827	1.192	0.999	0.182601	0.934	1.307	1.118	0.186506	0.722	1.046	0.99	0.173174
AAhSEGNTTAGLDMR-P78371-H3(ywj)	0.892	0.906	1.059	0.0926409	0.721	1.009	0.688	0.176576	0.661	1.157	0.886	0.248355	0.187	0.897	0.789	0.382572	0.982	1.114	1.173	0.0977974
LLcGLLAER-P14174-C3(ywj)	1.237	1.302	1.292	0.035	1.048	1.154	1.049	0.0609125	1.018	1.062	1.018	0.0254034	1.037	1.093	1.062	0.0280535	0.996	1.249	1.181	0.130931
GLPWScSADEVMR-P55795-C6(ywj)	0.928	1.081	0.943	0.0843386	0.943	0.925	0.993	0.0352326	0.975	0.993	0.988	0.00929157	0.992	0.895	0.959	0.0493187	1.058	0.945	0.998	0.0565361
HFILDEcDK-Q13838-C7(ywj)	1.069	1.247	1.19	0.0908974	1.065	1.151	0.938	0.107156	1.012	0.873	0.86	0.0842556	0.86	0.895	0.908	0.0248261	1.174	1.167	1.109	0.0356791
AITIAGVPQSVTEcVK-Q15365-C14(ywj)	1.036	1.278	0.882	0.199623	1.118	1.069	0.773	0.186656	1.197	1.125	0.852	0.181997	1.242	1.167	0.924	0.166232	1.025	0.792	0.91	0.116503
hLEINPDhPIVETLR-P08238-H1(ywj); H8(ywj)	1.085	1.079	0.975	0.0618493	0.937	0.639	0.899	0.162197	1.078	0.92	0.979	0.0798394	1.028	0.895	0.944	0.0672632	0.945	0.972	0.962	0.0136504
HFTILDAPGhK-P15170-H10(ywj)	1.24	0.935	1.339	0.210571	0.896	0.906	0.898	0.0052915	1.025	0.741	1.034	0.166626	0.976	0.744	0.948	0.126639	1.02	0.881	2.304	0.784528
IIYGGSVTGATcK-P60174-C12(ywj)	1.01	1.464	0.911	0.29488	1.038	1.002	0.757	0.152906	0.912	0.942	1.053	0.0742765	0.976	1.058	0.885	0.086539	1.014	1.153	0.891	0.131081
ELGSEcGIEFDEEK-P39656-C6(ywj)	1.182	0.865	0.963	0.162303	1.095	0.858	0.99	0.118756	1.123	0.903	1.097	0.120216	0.945	0.83	1.111	0.141269	0.973	0.883	0.942	0.0457202
LPVVIGGLLDVDcSEDVIK-Q00610-C13(ywj)	0.647	0.902	1.043	0.200716	0.655	1.338	1.282	0.3792	0.942	1.298	1.281	0.200809	1.119	1.291	1.418	0.150063	0.709	1.118	1.192	0.260143
hQAQIDHYLGLANK-Q9NQC3-H1(ywj)	1.383	1.586	0.909	0.347422	0.979	1.069	0.928	0.0713933	1.074	0.993	0.904	0.0850314	0.879	1.069	0.89	0.106663	0.983	1.185	0.889	0.151248
KITIADcGQLE-P62937-C7(ywj)	1.211	1.028	1.445	0.209019	0.958	1.141	0.932	0.113905	0.84	0.942	1.365	0.278376	0.933	1.023	1.166	0.1175	0.898	1.253	1.302	0.22047
GTIVLASPGWTThSISDGK-Q14914-H13(ywj)	1.218	0.997	1.064	0.113318	1.438	0.973	0.842	0.31321	1.145	0.943	0.944	0.116337	1.058	0.883	0.955	0.0879564	1.129	0.845	0.939	0.144679
DSNNLcLHFNPR-P09382-C6(ywj)	1.255	1.186	1.031	0.114718	1.012	1.083	0.916	0.0838113	1.006	0.949	0.904	0.0511175	0.898	0.921	0.81	0.0585861	1.255	1.147	1.174	0.056205
GAGTDEGcLIEILASR-P09525-C8(ywj)	0.946	0.81	0.941	0.0771168	1.105	0.992	1.039	0.0567656	1.079	1.02	1.326	0.16234	1.013	1.056	1.25	0.126263	0.919	0.842	1.007	0.0825611
TVIGDhGDELFSVFGAPFLK-P23141-H6(ywj)	0.735	1.027	0.813	0.151186	1.16	0.859	0.937	0.156212	1.108	1.176	0.991	0.0935753	1.251	1.389	0.957	0.220645	0.794	1.269	0.787	0.276284
RPPSGFFLFcSEFRPK-O15347-C10(ywj)	1.018	0.815	1.021	0.118078	0.961	1.047	1.071	0.0578389	1.274	0.97	1.032	0.160636	1.121	1.103	1.176	0.0380307	0.962	1.003	0.903	0.0502693
YDLLVSNAIQFLASVcERPHYK-P55060-C16(ywj)	1.146	0.535	0.934	0.310233	0.555	0.892	0.797	0.173761	1.17	1.147	1.174	0.0145717	1.121	1.001	1.166	0.0852936	0.932	0.962	0.762	0.107858
TTGIVMDSGDGVTHTVPIYEGYALPhAILR-P60709-H26(ywj)	1.136	1.084	1.013	0.0617441	1.08	0.861	0.887	0.119643	1.022	0.741	0.938	0.144237	1.022	0.867	1.012	0.0867468	0.927	0.902	0.786	0.0752352
LVSNHSLhETSSVFVDSLTK-P21333-H8(ywj)	1.074	1.367	0.728	0.319866	0.882	0.831	0.871	0.026839	1.01	0.924	0.667	0.178463	0.823	0.974	0.836	0.0836799	1.034	0.612	0.636	0.237018
LGDVISIQPcPDVK-P55072-C10(ywj)	1.049	1.131	0.998	0.0670994	1.095	1.053	0.922	0.0902349	1.16	1.033	0.911	0.124508	0.922	0.931	0.94	0.009	1.147	1.085	1.105	0.0316439
GLVYIQQTDDSLIHFcWK-Q16186-C16(ywj)	1.059	0.793	1.108	0.1695	0.9	0.827	0.763	0.0685493	1.206	1.135	0.716	0.264796	1.129	0.998	1.122	0.0736953	0.801	0.778	0.844	0.0335012
GYGFITFSDSEcAK-Q14498-C12(ywj)	0.831	1.135	1.104	0.167285	0.878	1.017	0.988	0.073328	1.144	0.946	1.18	0.126	0.986	0.974	1.113	0.0770216	1.269	0.858	1.026	0.206637
GFAFVTFDDhDSVDK-P09651-H10(ywj)	1.432	1.085	1.025	0.219719	1.326	1.181	0.949	0.190166	1.324	0.971	0.821	0.258237	0.987	0.952	0.804	0.0971408	1.37	1.06	1.016	0.192939
GETDEEYLWcIEQTLYFK-P23526-C10(ywj)	0.668	0.851	1.265	0.305858	0.871	0.843	1.218	0.208893	0.905	1.08	1.107	0.109665	0.956	1.207	1.264	0.163867	0.754	0.891	0.796	0.0701878
IMDPNIVGSEhYDVAR-P06576-H11(ywj)	0.949	1.134	1.031	0.0926984	0.874	1.162	0.754	0.209685	1.062	0.993	0.81	0.130227	0.831	0.96	0.741	0.110077	1.055	0.882	1.088	0.110645
DLVVLLFETALLSSGFSLEDPQThSNR-P08238-H24(ywj)	0.62	0.737	0.499	0.119006	1.348	1.152	1.133	0.119025	1.159	1.033	0.801	0.181597	1.323	1.109	1.354	0.133405	0.912	0.532	0.753	0.190841
SSNPIIVScGWDK-P63244-C9(ywj)	0.834	0.747	1.529	0.428586	0.739	0.795	1.181	0.240657	0.97	0.995	1.349	0.211968	0.942	0.924	1.171	0.137704	0.87	0.943	1.238	0.194841
AHVVPcFDASK-P21333-C6(ywj)	1.092	0.99	1.146	0.0792212	1.061	0.9	0.993	0.0808229	0.726	1.012	0.928	0.147001	0.708	0.872	0.891	0.10062	0.805	1.271	1.458	0.336287
FIQENIFGIcPH-P30101-C10(ywj)	1.109	0.931	1.019	0.0890019	1.005	0.976	0.817	0.101214	1.166	0.92	0.877	0.155931	1.12	1.046	0.938	0.0915278	1.02	0.925	0.789	0.116105
LVLEVAQhLGESTVR-P06576-H8(ywj)	0.772	1.155	1.028	0.195087	0.979	0.936	0.743	0.125694	0.907	0.94	0.891	0.0249867	0.861	0.993	0.965	0.0695509	0.899	0.907	1.171	0.154782
IIPAIATTTAAVVGLVcLELYK-P22314-C17(ywj)	0.812	0.714	1.24	0.279721	0.8	0.792	1.041	0.141507	0.89	1.112	1.485	0.300676	1.132	1.328	1.605	0.237653	1.013	1.109	1.359	0.178621
HELQANcYEEVK-P23528-C7(ywj)	1.056	1.099	1.216	0.082803	1.064	0.968	1.102	0.0690604	0.872	0.921	1.045	0.0891684	0.705	0.806	0.81	0.0595007	0.887	1	1.224	0.17152
LGEWVGLcK-P25398-C8(ywj)	1.014	1.04	1.017	0.0142244	0.988	1.126	0.876	0.125225	1.035	0.994	0.894	0.0725282	1.003	1.141	0.911	0.115764	0.852	1.011	0.921	0.0797308
MEEFKDQLPADEcNK-P38646-C13(ywj)	1.103	0.948	1.021	0.0775435	1.003	0.914	0.983	0.046694	0.922	0.815	0.734	0.0942992	0.863	0.842	0.739	0.0663652	1.134	0.986	0.959	0.0942143
LWNTLGVcK-P63244-C8(ywj)	1.007	1.097	1.394	0.202517	1.002	1.017	0.93	0.0465081	0.96	0.976	1.159	0.110564	1.127	0.812	1.002	0.158614	0.857	0.844	0.872	0.0140119
LDYLDLYLIhWPTGFKPGK-P15121-H10(ywj)	1.055	1.057	0.856	0.115474	0.928	0.896	1.045	0.0784368	1.291	1.161	1.172	0.0720902	1.231	1.119	1.346	0.113503	1.134	0.736	1.082	0.216342
LLEAQAcTGGIIDPSTGER-Q15149-C7(ywj)	1.622	1.219	0.878	0.37243	1.442	1.02	0.622	0.410059	0.516	0.748	0.807	0.153832	1.647	1.045	0.763	0.45155	1.397	0.726	0.757	0.37877
SHFEQWGTLTDcVVMR-P09651-C12(ywj)	0.759	0.866	0.691	0.0882213	0.779	0.68	0.601	0.0891871	0.981	1	0.861	0.075368	1.001	1.013	0.989	0.012	0.766	0.722	0.749	0.0221886
GLGTDEDSLIEIIcSR-P07355-C14(ywj)	0.835	0.97	1.108	0.136503	0.995	0.994	0.94	0.0314696	0.956	1.158	1.024	0.102781	1.051	1.177	1.084	0.0653376	1.21	0.959	0.974	0.140785
TSSSIPPIILLQFLhMAFPQFAEK-P54578-H15(ywj)	0.436	1.15	1.31	0.465344	1.178	1.442	0.997	0.223786	1.185	1.542	1.293	0.183082	0.961	1.445	1.605	0.335309	1.059	0.834	1.273	0.219523
AQIhDLVLVGGSTR-P08107-H4(ywj)	1.093	1.052	1.217	0.0859089	0.941	0.938	0.938	0.00173205	0.933	1.045	0.87	0.088636	0.882	0.905	0.911	0.015308	0.965	1.077	1.052	0.0587906
VcNPIITK-P11142-C2(ywj)	1.057	1.383	1.13	0.171082	0.983	0.945	1.015	0.0350428	0.761	0.961	1.016	0.134195	0.855	0.881	0.841	0.0202978	0.828	1.039	1.107	0.14548
ALGVSNFShFQIEK-O60218-H9(ywj)	1.129	1.132	1.108	0.0130767	1.012	0.877	1.014	0.078526	1.061	0.924	0.931	0.0771557	0.969	0.883	0.858	0.0582266	1.069	1.003	1.05	0.0339755
EAGDVcYADVYR-Q07955-C6(ywj)	1.1	1.357	0.997	0.185409	1.095	0.983	0.973	0.0677348	0.917	0.864	0.96	0.0480867	0.885	0.885	0.849	0.0207846	1.15	1.13	1.125	0.0132288
YSNVIFLEVDVDDcQDVASEcEVK-P10599-C14(ywj); C21(Carbamidomethyl)	0.746	0.829	0.613	0.10896	0.923	1.551	0.75	0.421488	0.972	1.514	0.938	0.323186	1.242	1.489	1.226	0.147442	0.666	0.536	0.916	0.193132
EAVcIVLSDDTcSDEK-P55072-C4(ywj); C12(ywj)	0.743	1.158	0.731	0.243139	0.968	1.126	0.919	0.108177	0.97	1.132	1.121	0.0905226	0.824	1.214	0.89	0.208739	0.87	1.093	0.853	0.133927
ccSGAIIVLTK-P14618-C1(Carbamidomethyl); C2(ywj)	0.882	0.862	1.096	0.129713	0.868	1.035	0.978	0.0848901	1.048	1.047	1.009	0.0222336	1.139	0.952	1.206	0.13164	1.001	0.896	1.136	0.120312
LIHFSGVALGEAcTIVLR-P78371-C13(ywj)	0.794	0.642	0.486	0.154004	1.283	1.103	1.221	0.0914403	1.054	1.035	0.966	0.0463069	1.185	1.251	1.228	0.0335012	1.047	1.121	0.877	0.125108
LILDVFcGSQMHFVR-P11413-C7(ywj)	0.775	0.969	0.862	0.0971717	0.938	0.878	0.997	0.0595007	1.027	1.274	1.101	0.126764	1.257	1.256	1.236	0.0118462	0.984	0.896	1.052	0.0782134
ALLYLcGGDD-P07355-C6(ywj)	0.871	0.929	1.008	0.0687677	1.183	0.947	1.024	0.120351	1.078	1.062	1.061	0.00953939	1.028	1.072	1.08	0.028	1.085	0.967	1.005	0.0602329
AEGSDVANAVLDGADcIMLSGETAK-P14618-C16(ywj)	0.77	0.916	0.985	0.109774	0.95	1.626	1.007	0.374919	1.048	1.9	1.009	0.503538	1.126	2.508	1.142	0.79332	0.962	0.754	1.161	0.203517
TSDIFFDNFIIcADR-P27824-C12(ywj)	0.838	0.907	0.943	0.0533573	0.957	0.901	0.931	0.0280238	1.036	1.003	1.11	0.0547936	1.07	1.026	1.076	0.0273008	0.941	0.865	0.974	0.0558957
hFSGLEEAVYR-P50990-H1(ywj)	0.968	1.092	1.173	0.103249	0.876	0.978	1.03	0.0783411	0.834	0.911	0.897	0.0410163	0.813	0.889	0.817	0.0427707	0.899	1.01	0.996	0.0604511
VFIMDScDELIPEYLNFIR-P08238-C7(ywj)	1.166	0.774	1.048	0.201107	1.204	1.238	1.297	0.0470567	1.113	1.406	1.018	0.202245	1.147	1.229	1.003	0.114409	1.082	0.941	1.193	0.126297
AhSSMVGVNLPQK-P00558-H2(ywj)	1.259	1.597	1.291	0.186594	1.19	1.232	1.076	0.0807217	1.029	0.949	0.986	0.0400375	0.959	1.053	0.904	0.0753459	1.001	1.531	1.164	0.271465
EEFASTcPDDEEIELAYEQVAK-O00299-C7(ywj)	0.97	1.108	0.725	0.193975	0.977	0.785	1.152	0.183566	1.049	0.813	1.029	0.130864	1.001	0.764	0.925	0.121014	1.095	0.471	1.295	0.429797
TDDYLDQPcYETINR-P50395-C9(ywj)	0.756	1.078	0.973	0.164214	0.801	0.846	0.911	0.0553022	0.758	0.752	0.941	0.107429	0.837	0.891	0.777	0.0570263	0.805	1.215	0.96	0.207023
EhPWEVMPDLY-P08865-H2(ywj)	0.972	1.106	1.178	0.104543	1.044	1.168	0.963	0.103249	1.016	1.337	1.078	0.170277	1.084	0.992	1.061	0.0478783	0.832	0.887	1.289	0.249492
DGNASGTTLLEALDcILPPTRPTDK-P68104-C15(ywj)	1.18	0.786	1.02	0.198155	2.052	0.901	1.413	0.576667	1.45	0.98	0.94	0.283608	1.913	1.007	1.473	0.453062	2.651	1.964	1.32	0.665616
LYVYNTDTDNcR-Q9H8Y8-C11(ywj)	1.102	1.115	1.576	0.26999	1.256	1.133	0.905	0.178098	0.869	0.844	1.316	0.265587	0.932	0.914	1.015	0.0538733	1.093	1.503	1.236	0.208102
hSGNITFDEIVNIAR-P30050-H1(ywj)	0.744	1.22	0.867	0.247088	1.104	1.088	0.934	0.0938723	0.793	0.962	1.216	0.212919	0.883	1.147	0.909	0.145497	0.942	1.053	0.897	0.0802932
YKPVTNQVEcHPYLTQEK-O60218-C10(ywj)	1.318	1.225	1.048	0.13716	0.917	0.949	0.823	0.065493	0.987	0.913	0.941	0.0373631	0.847	0.654	0.804	0.101323	0.931	0.677	0.873	0.133101
QAAPcVLFFDELDSIAK-P55072-C5(ywj)	0.446	0.789	0.946	0.255701	0.993	1.157	0.962	0.104787	1.001	0.912	1.206	0.150766	1.012	1.13	1.082	0.0593408	0.761	0.682	0.983	0.156059
VGFQSFFSLIAGLTIAcNDYFVVHMK-P60903-C17(ywj)	0.532	0.676	0.847	0.157693	1.056	1.22	1.999	0.503816	1.032	1.049	1.2	0.0924788	1.524	1.832	1.721	0.155988	0.771	0.907	0.955	0.0954428
GThTGVWVGVSGSETSEALSR-P49327-H3(ywj)	0.846	0.834	1.187	0.20043	1.045	1.295	0.972	0.16939	0.841	1.267	0.97	0.218451	1.293	1.199	0.986	0.157297	1.395	0.441	1.32	0.530469
ISSDLDGhPVPK-P29401-H8(ywj)	1.299	0.911	1.081	0.194494	1.112	1.157	1.061	0.0480312	0.945	0.935	0.782	0.0913583	0.836	0.868	0.953	0.0604676	1.057	1.119	1.331	0.14368
TDEFQLhTNVNDGTEFGGSIYQK-P21796-H7(ywj)	0.357	1.037	1.22	0.454727	0.652	0.977	0.282	0.347743	1.072	1.085	0.859	0.126895	0.931	0.925	0.447	0.277722	0.932	1.199	1.167	0.145796
LDYLDLYLIhWPTGFK-P15121-H10(ywj)	1.021	1.002	1.199	0.108669	1.186	1.056	1.16	0.0687895	1.196	1.445	1.466	0.15019	1.366	1.322	1.43	0.0543078	1.139	1.029	1.158	0.0696443
ELQELVQYPVEhPDK-P55072-H12(ywj)	1.222	1.448	0.771	0.344675	1.016	0.776	0.953	0.124431	0.826	0.843	0.873	0.0237978	0.971	1.197	1.146	0.118534	0.959	0.921	1.338	0.23057
LSYLDVYLIhWPQGFK-O60218-H10(ywj)	0.869	0.826	0.784	0.042501	0.933	0.993	0.993	0.034641	1.187	1.076	1.242	0.0845596	1.312	1.306	1.293	0.00971253	0.881	0.816	0.918	0.0516366
hQPTAIIAK-P29401-H1(ywj)	1.378	1.27	1.101	0.139615	0.844	0.892	0.634	0.137215	0.919	0.913	1.098	0.105121	0.683	0.963	0.875	0.143183	0.951	0.908	0.92	0.0221886
GFSIPEcQK-O75390-C7(ywj)	1.237	1.354	1.13	0.112037	1.025	0.905	1.141	0.118006	0.976	0.992	0.99	0.0087178	0.985	1.002	1.032	0.0237978	1.356	1.213	1.202	0.0859127
LSEcEEQAK-Q7KZF4-C4(ywj)	0.989	0.942	0.958	0.0238956	0.859	0.927	1.087	0.117053	0.782	0.871	1.046	0.134314	0.696	0.711	0.83	0.0734189	1.032	0.924	1.046	0.0667633
GQDHcGIESEVVAGIPR-P07858-C5(ywj)	1.091	1.073	1.054	0.0185023	1.106	0.962	0.868	0.119872	0.96	1.06	1.003	0.0501631	0.931	1.025	0.876	0.0753459	0.972	1.046	0.822	0.114129
NGNPNGEGLPhWPEYNQK-P23141-H11(ywj)	0.872	0.864	0.628	0.138622	1.21	1.025	0.45	0.396327	1.048	0.943	0.728	0.163121	0.786	0.864	0.776	0.0481802	0.64	0.794	0.517	0.138789
FhQLDIDDLQSIR-P16152-H2(ywj)	1.252	0.97	1.026	0.149296	1.061	0.916	1.163	0.124122	0.97	0.797	1.118	0.160662	0.835	0.759	0.999	0.122659	1.102	0.622	1.104	0.277707
LGETYKDhENIVIAK-P07237-H8(ywj)	0.975	1.592	1.965	0.499986	1.33	1.13	0.814	0.260164	0.8	1.258	1.455	0.336055	0.679	0.791	1.392	0.383431	1.164	1.648	1.703	0.296592
DLVILLYETALLSSGFSLEDPQThANR-P07900-H24(ywj)	0.976	1.183	0.519	0.339753	2.073	2.107	1.149	0.543553	1.668	1.36	1.214	0.231767	2.751	2.153	1.608	0.571705	1.57	1.494	1.018	0.299181
GANDFMcDEMER-P17987-C7(ywj)	0.917	1.029	1.026	0.0638148	1.057	1.033	1.052	0.0126623	0.898	0.96	1.064	0.0838809	0.92	0.936	0.864	0.0378065	0.871	0.993	1.02	0.0793872
GMYGIENEVFLSLPcILNAR-P07195-C15(ywj)	0.967	1.134	0.92	0.112468	1.031	0.897	1.156	0.129526	1.176	0.965	1.251	0.148291	1.276	1.165	1.346	0.0912707	0.982	1.066	0.945	0.0620027
NVNAGGhK-P21796-H7(ywj)	1.092	1.26	1.039	0.115379	1.007	1.061	1.29	0.150248	0.838	0.761	0.981	0.111638	0.831	0.777	0.965	0.0967953	1.232	1.372	1.37	0.0802579
VDIQTEDLEDGTcK-O75369-C13(ywj)	1.014	1.229	1.127	0.107547	0.899	1.314	0.95	0.226319	0.782	0.83	0.88	0.0490034	0.696	0.974	0.88	0.141407	0.83	1.002	1.187	0.178539
ILFIFIDSDhTDNQR-P07237-H10(ywj)	0.922	0.978	0.96	0.028589	0.835	0.908	0.978	0.0715052	1.179	1.079	0.921	0.130082	1.304	1.165	1.259	0.0709248	0.914	0.801	0.963	0.0830803
LSLEGDhSTPPSAYGSVK-P07355-H7(ywj)	1.981	0.724	1.873	0.696648	0.91	1.169	0.971	0.135404	1.585	1.02	0.923	0.357509	1.028	0.903	0.971	0.0625806	1.093	0.981	1.343	0.185332
DINAYNcEEPTEK-P30041-C7(ywj)	1.019	1.004	0.983	0.0180831	1.022	1.072	1.236	0.111946	0.894	0.853	1.016	0.084788	0.656	0.908	0.889	0.140329	1.113	1.212	1.157	0.0496017
FDhILYTGSTGVGK-P30838-H3(ywj)	1.05	1.131	0.919	0.106978	1.03	0.859	1.037	0.100808	1.081	0.926	0.888	0.10224	1.037	0.905	0.805	0.116367	1.158	1.025	0.996	0.0863848
DYFGAhTYELLAK-P52209-H6(ywj)	1.269	0.975	0.978	0.168882	1.175	1.096	1.096	0.0456107	1.195	1.139	0.974	0.114893	1.296	1.101	0.914	0.191014	1.01	1.232	1.161	0.113377
YcAGWADK-P00352-C2(ywj)	1.131	1.132	1.069	0.0360879	0.872	0.797	0.92	0.0619919	0.917	0.882	0.878	0.0214554	0.834	0.843	0.769	0.0403774	1.021	0.97	0.935	0.0432474
DNEVDFQEYcVF-P26447-C10(ywj)	1.085	0.932	0.935	0.0874814	1.02	1.236	1.004	0.129574	0.991	1.096	0.977	0.065041	1.021	1.11	1.045	0.0460471	1.051	1.042	0.938	0.0628039
DIcNDVLSLLEK-P63104-C3(ywj)	1.127	1.083	0.958	0.0876755	0.751	0.994	1.097	0.177658	1.011	1.151	1.201	0.0984886	0.92	1.003	1.001	0.0473533	0.897	0.851	1.053	0.105874
hGYPLIIYDVFPDAcK-P31937-H1(ywj); C15(ywj)	1.176	0.956	1.352	0.198407	0.814	0.834	1.256	0.249616	1.065	1.05	1.403	0.199615	1.023	1.252	1.963	0.490164	0.804	0.88	0.901	0.0510327
hIDCAhVYQNENEVGVAIQEK-P15121-H1(ywj); H6(ywj)	0.978	0.986	1.027	0.0262869	1.005	0.943	0.83	0.0887299	1.038	0.853	0.907	0.0951332	1.016	0.842	0.832	0.103467	1.113	0.922	0.892	0.119876
HSDGNLcVK-P49458-C7(ywj)	1.108	1.253	1.149	0.0747462	0.942	1.064	0.933	0.0731733	0.856	0.771	0.869	0.0532259	0.743	0.818	0.886	0.0715285	1.049	1.224	1.014	0.112509
HGEVcPAGWKPGSDTIKPDVQK-Q06830-C5(ywj)	1.012	1.362	0.739	0.312292	1.12	1.029	1.029	0.0525389	0.875	1.211	1.244	0.204184	0.75	1.078	0.969	0.167046	1.165	1.064	1.209	0.0743438
hFYWYLTNEGIQYLR-P46783-H1(ywj)	1.244	1	1.023	0.134726	1.083	0.84	1.074	0.137772	1.114	1.081	1.207	0.0653376	1.222	1.194	1.352	0.084309	0.989	0.952	1.058	0.053799
GcLDEETSR-Q15149-C2(ywj)	1.33	1.134	1.081	0.131165	0.97	0.924	0.794	0.0912798	0.963	0.848	0.78	0.0925005	0.814	0.973	0.858	0.0820995	0.925	1.029	1.146	0.110564
DNIAcVILTFK-P11413-C5(ywj)	0.797	0.771	0.753	0.0221209	1.139	1.225	1.155	0.0457384	1.032	1.2	1.136	0.0847899	1.107	1.326	1.275	0.114591	0.97	1.092	1.041	0.0612726
KGDVKPLAEQIAITAGcK-P23141-C17(ywj)	1.122	1.122	1.205	0.0479201	0.977	0.996	0.957	0.0195021	0.908	0.994	1.095	0.0936002	0.831	0.886	1.108	0.14665	0.946	0.816	0.967	0.0817945
ILFDTVDLcATWEAVEK-Q04828-C9(ywj)	0.917	0.893	0.71	0.113221	0.903	0.987	0.969	0.0442267	1.117	1.059	1.045	0.038175	1.034	1.15	1.137	0.0635531	0.912	1.022	0.973	0.055109
DALDGPAAEAEPEhSFDGLR-Q15149-H14(ywj)	1.21	1.08	0.823	0.196942	0.779	1.185	0.841	0.218714	0.928	0.94	1.022	0.0511599	0.891	0.834	1.086	0.132148	0.955	1.201	0.961	0.140328
hLHFTLVK-P11216-H1(ywj)	0.887	0.87	0.895	0.0127671	0.727	0.798	0.873	0.0730091	0.795	0.929	0.851	0.0673003	0.726	0.936	0.767	0.111312	0.85	0.945	0.908	0.0478853
VNPcIGGVILFHETLYQK-P04075-C4(ywj)	0.663	0.758	0.742	0.0508626	0.823	0.779	0.923	0.0737925	1.015	1.058	1.091	0.0381095	1.188	1.132	1.225	0.0468224	0.871	0.798	0.915	0.059096
AGKPVIcATQMLESMIK-P14618-C7(ywj)	0.831	0.742	0.674	0.0787337	0.927	0.737	0.726	0.113006	0.85	0.792	0.862	0.0374344	0.841	0.934	0.916	0.0493254	0.726	0.846	0.833	0.0658508
TVPFcSTFAAFFTR-P29401-C5(ywj)	0.859	0.809	1.009	0.104083	1.058	0.983	1.104	0.0610765	1.198	1.192	1.206	0.00702377	1.265	1.269	1.375	0.0623859	0.991	0.972	1.001	0.0147309
ALDVMVSTFhK-P26447-H10(ywj)	1.02	1.048	1.083	0.0315647	1.027	1.12	1.034	0.0517912	0.977	1	0.968	0.0165025	0.919	0.915	0.937	0.0117189	1.033	1.011	1.01	0.013
LGDVYVNDAFGTAhR-P00558-H14(ywj)	1.03	0.967	0.916	0.0571052	0.924	1.012	1.109	0.0925365	0.773	0.974	0.92	0.104024	0.777	0.861	0.881	0.0551845	1.144	0.997	0.942	0.104433
LASTLVhLGEYQAAVDGAR-Q00610-H7(ywj)	0.996	0.924	1.232	0.161113	0.839	1.031	1.181	0.171429	0.844	0.954	1.099	0.1279	0.76	1.096	1.135	0.206172	1.056	1.394	1.17	0.171957
MMcNEFFEGFPDK-P26447-C3(ywj)	1.152	1.073	1.063	0.0487545	0.774	0.642	1.048	0.207097	1.32	1.136	1.028	0.147639	1.156	1.052	1.114	0.0523195	1.06	1.125	0.97	0.0778353
ADVQLFMDDDSYSHhSGLEYADPEK-P51636-H15(ywj)	0.661	1.08	0.854	0.209716	1.172	1.17	0.86	0.179559	0.827	0.809	0.822	0.00929157	0.727	1.018	0.603	0.213027	0.501	0.977	0.838	0.244767
VcEEIAIIPSK-P0CW22-C2(ywj)	0.855	0.891	1.033	0.0941134	0.756	0.888	0.845	0.0673226	0.877	0.803	0.902	0.0514814	0.87	0.904	0.969	0.0503024	0.935	0.92	1.01	0.0482183
ALAGcDFLTISPK-P37837-C5(ywj)	1.135	1.006	0.921	0.107751	0.919	0.987	0.99	0.0401539	0.92	0.963	0.968	0.0263881	1.053	1	0.981	0.037314	1.115	0.934	0.986	0.0931898
VYQNEhEVGEAIQEK-O60218-H6(ywj)	1.193	0.872	1.159	0.176336	1.203	0.95	1.308	0.184028	1.082	0.576	1.012	0.274175	0.748	0.497	0.817	0.168405	0.884	0.767	1.203	0.225664
YKPVTNQVEchPYLTQEK-O60218-C10(Carbamidomethyl); H11(ywj)	0.862	1.014	0.92	0.0767072	0.81	0.859	0.887	0.0389744	0.703	1.039	1.232	0.267702	0.744	0.884	0.79	0.0713583	0.903	1.09	1.086	0.106829
AVENcQDSWR-P52209-C5(ywj)	1.237	0.971	1.16	0.136873	1.101	0.919	0.984	0.0922298	0.931	1.052	1.017	0.0622656	0.939	0.739	1.071	0.167157	1.123	0.933	1.21	0.141656
VVDLMAhMA-P04406-H7(ywj)	0.967	0.98	1.056	0.0480729	0.841	0.857	0.986	0.0795005	1.039	0.858	1.002	0.095626	0.867	0.879	0.975	0.0591946	1.046	1.008	0.946	0.0504777
GFAFVTFDDhDTVDK-P51991-H10(ywj)	1.182	0.816	1.145	0.20148	1.241	0.979	0.998	0.14609	1.151	1.034	0.986	0.0848705	1.099	1.25	0.994	0.128687	0.926	0.908	0.95	0.0210713
EALEAESAWcYLYGTGSVAGVYLPGSR-Q15149-C10(ywj)	0.745	0.651	0.816	0.0827667	1.082	0.709	1.135	0.232169	0.728	0.947	0.978	0.136273	1.023	1.206	1.244	0.118162	0.981	1.129	0.689	0.223893
ScVEEPEPEPEAAEGDGDKK-P51858-C2(ywj)	0.97	0.895	0.983	0.0475009	0.987	1.045	0.881	0.0831625	0.706	0.484	0.788	0.157281	0.703	0.801	0.756	0.0490544	1.076	0.568	1.071	0.291861
AAAIGIDLGTTYScVGVFQHGK-P08107-C14(ywj)	0.876	1.092	0.88	0.123569	0.867	1.022	0.949	0.0775435	1.116	1.429	1.227	0.158689	1.026	1.396	1.434	0.225392	0.793	1.606	1.146	0.407672
YKPAVNQIEchPYLTQEK-P15121-C10(Carbamidomethyl); H11(ywj)	1.296	1.951	1.072	0.456772	0.891	0.867	0.806	0.0438216	0.979	0.811	0.917	0.0849549	0.728	0.846	0.892	0.0845931	1.157	1.241	1.138	0.0548118
ASVGFGGScFQK-O60701-C9(ywj)	1.012	1.415	0.681	0.367588	0.904	0.934	0.744	0.102144	0.964	1.269	0.874	0.207023	0.914	0.99	0.906	0.0463609	1.174	1.329	0.876	0.230231
hGHFGWPGWEMGPPGNWSPRPPR-Q13501-H1(ywj)	1.009	0.679	0.657	0.197184	1.003	1.037	0.885	0.0797747	1.122	1.347	0.944	0.201956	1.038	1.261	0.859	0.201401	1.191	1.015	0.883	0.154523
INSITVDNcK-Q01518-C9(ywj)	0.788	0.96	1.16	0.186176	0.709	1.011	1.015	0.175526	0.635	0.886	0.846	0.134859	0.705	0.879	0.974	0.13642	0.67	1.168	1.136	0.278742
ALENDPDcK-Q14651-C8(ywj)	1.355	1.099	0.898	0.229051	1.017	1.135	1.022	0.0667308	0.825	0.863	0.769	0.0472864	0.851	0.963	0.75	0.106547	1.113	1.66	0.853	0.411918
YGYIHLYDLETGTcIYMNR-Q00610-C14(ywj)	0.682	0.814	0.645	0.0888388	1.15	1.467	0.746	0.361374	1.149	1.328	0.817	0.259289	1.157	1.407	1.051	0.182789	0.975	0.94	1.037	0.0491223
ccSGAIIVLTK-P14618-C1(ywj); C2(ywj)	0.474	0.572	0.7	0.113331	0.424	0.507	0.648	0.113245	0.645	0.456	0.722	0.136873	0.527	0.394	0.95	0.290331	0.484	0.355	0.608	0.126508
ELhINLIPNK-P07900-H3(ywj)	1.211	0.752	0.922	0.232057	1.052	0.963	0.737	0.162389	0.86	0.846	0.834	0.0130128	0.983	0.896	0.732	0.127453	1.302	0.955	1.11	0.173828
YVDIAIPcNNK-P08865-C8(ywj)	1.158	1.177	0.97	0.114422	0.978	1	1.001	0.013	1.052	1.02	1.01	0.0219393	0.922	0.904	1.016	0.0601443	1.174	1.161	1.191	0.0150444
YQIDPDAcFSAK-P21796-C8(ywj)	1.115	0.954	1.263	0.154546	0.884	0.794	1.043	0.126083	1.062	0.915	1.03	0.0773067	0.895	0.948	0.954	0.0324705	0.904	1.15	0.884	0.14814
LQLEAcETR-Q15149-C6(ywj)	0.991	0.878	0.9	0.0599083	1.091	0.784	0.767	0.182352	0.986	0.75	0.802	0.124	0.93	0.727	0.759	0.109144	1.075	0.875	1.032	0.105276
TGQATVASGIPAGWMGLDcGPESSK-P00558-C19(ywj)	0.96	0.751	0.931	0.113227	1.296	0.891	0.97	0.214687	1.388	1.023	0.956	0.2325	1.05	0.836	0.959	0.107398	1.38	0.937	1.194	0.222446
IQQESGcK-Q96AE4-C7(ywj)	1.276	1.292	1.033	0.145136	1.021	1.038	0.94	0.0523673	0.961	0.817	0.857	0.0743326	0.76	0.766	0.643	0.069347	1.174	1.015	0.768	0.204583
AYWQVHLDQVEVASGLTLcK-P07339-C19(ywj)	0.696	0.448	0.762	0.165558	0.915	0.982	0.905	0.0418688	1.1	0.801	1.045	0.159145	1.143	0.975	1.086	0.0854342	0.998	0.711	0.67	0.178715
AGALQcSPSDAYTK-Q9Y490-C6(ywj)	1.789	1.146	1.385	0.325009	1.384	0.851	1.25	0.277262	1.219	0.982	1.272	0.154423	1.058	0.966	1.142	0.0880303	1.588	1.127	1.361	0.230509
FQYDSThGK-P04406-H7(ywj)	1.169	1.404	0.776	0.317295	0.948	1.048	0.649	0.207606	0.835	0.861	0.707	0.0824379	0.917	0.888	0.82	0.0497896	1.212	1.11	1.25	0.0723971
VNVPVIGGhAGK-P40926-H9(ywj)	0.962	1.138	1.242	0.141534	1.044	1.002	1.036	0.022301	0.92	1.009	0.933	0.0480729	0.843	1.015	1.003	0.0960278	1.073	1.117	1.076	0.0245832
IFPVLcK-P14618-C6(ywj)	1.169	1.274	1.177	0.0584494	0.962	1.084	1.019	0.0610437	0.99	1.103	1.04	0.0566245	0.978	0.981	0.924	0.032078	1.094	1.133	1.13	0.0217025
GAAFELVFIVLAEhYK-P56470-H14(ywj)	1.23	0.709	0.801	0.278073	1.087	1.077	1.028	0.0315753	1.82	1.062	0.89	0.494814	1.656	1.353	1.156	0.251866	1.266	0.767	0.622	0.337827
SGETEDTFIADLVVGLcTGQIK-P06733-C17(ywj)	0.798	0.956	0.909	0.0811316	0.78	1.008	0.797	0.127013	0.86	1.458	0.897	0.335086	1.011	1.352	1.246	0.174519	0.73	1.312	0.637	0.365832
VIhDNFGIVEGLMTTVH-P04406-H3(ywj)	1.207	0.801	0.886	0.214127	1.301	0.835	0.966	0.240327	1.29	0.862	1.033	0.215435	1.159	0.923	0.957	0.127577	1.121	0.83	0.946	0.146493
DcVGPEVEK-P00558-C2(ywj)	1.242	1.18	1.206	0.0311341	0.951	1.067	1.053	0.0633193	0.911	0.987	1.031	0.0607069	0.738	0.872	0.835	0.0692026	1.159	1.227	1.104	0.0616144
ETVSEESNVLcLSK-P13639-C11(ywj)	1.093	1.084	0.908	0.104309	1.014	1.125	1.096	0.0575702	1.017	1.008	1.052	0.0232451	0.852	0.823	0.814	0.0198578	1.07	1.04	0.637	0.241798
ADTEVVcAPPTAYIDFAR-P60174-C7(ywj)	0.809	0.979	0.886	0.0851254	1.079	0.861	0.999	0.110278	1.022	1.093	1.058	0.0355012	0.905	1.16	1.066	0.128959	0.761	1.105	1.006	0.177088
VAHALAEGLGVIAcIGEK-P60174-C14(ywj)	0.832	1.083	0.793	0.157386	0.954	1.037	0.885	0.0761074	1.108	1.053	0.984	0.0621316	1.031	1.052	0.959	0.048775	1.043	0.818	0.814	0.131074
GQIAFDDFIQGcIVLQR-O75340-C12(ywj)	0.948	1.09	0.936	0.0856582	1.147	1.064	1.235	0.0855122	1.173	0.861	1.128	0.168651	1.173	1.317	1.569	0.20044	0.871	0.745	1.04	0.148021
AIGISNFNhLQVEMILNKPGLK-P15121-H9(ywj)	0.753	0.889	0.873	0.0743326	0.962	1.089	0.887	0.102109	0.919	1.179	1.076	0.130931	1.121	1.256	1.051	0.104203	0.714	1.083	0.845	0.187068
IHWWENVYGFDMScIK-Q99873-C14(ywj)	1.165	1.015	0.936	0.11632	1.11	1.259	1.006	0.127165	1.327	1.339	0.946	0.223515	0.971	1.401	1.084	0.222919	1.066	0.948	0.871	0.0982157
GFEVVYMTEPIDEYcVQQLK-P08238-C15(ywj)	0.863	0.984	0.693	0.146186	0.69	1.082	0.823	0.199346	0.927	0.888	0.916	0.020108	1.241	1.141	1.221	0.052915	0.838	1.012	0.744	0.135975
AcPLDQAIGLLVAIFhK-P06703-C2(ywj); H16(ywj)	1.055	1.101	1.38	0.17587	0.845	1.249	0.925	0.213928	0.926	1.188	1.17	0.146347	1.158	1.521	1.405	0.185398	1.156	1.237	1.12	0.059925
FLQDcQELSLWINEK-Q01082-C5(ywj)	1.224	0.608	1.111	0.327931	1.02	1.039	1.54	0.29489	1.771	0.882	1.339	0.444559	1.06	1.066	1.249	0.107429	1.007	0.841	1.006	0.0955528
YLAEVAcGDDR-P27348-C7(ywj)	1.013	1.098	0.967	0.0664605	0.973	1.05	0.883	0.0835843	0.905	0.931	0.905	0.0150111	0.714	0.787	0.824	0.0559732	1.109	1.1	0.955	0.0864311
LGSTAIGIQTSEGVcLAVEK-P28066-C15(ywj)	1.092	0.892	0.78	0.158055	0.983	1.077	0.973	0.057376	0.994	1.068	0.89	0.0894204	0.793	0.984	0.716	0.137982	1.044	0.954	0.902	0.0718424
LGQSDPAPLQhQMDIYQK-P29401-H11(ywj)	0.882	1.285	1.005	0.206534	0.949	1.264	0.784	0.243875	0.969	0.752	1.037	0.14885	0.893	0.818	0.971	0.0765049	1.167	0.844	1.133	0.177485
SLEDPQThSNR-P08238-H8(ywj)	1.191	1.71	1.217	0.292428	1.208	1.286	0.664	0.338847	1.174	1.41	0.822	0.295901	0.833	1.07	0.597	0.2365	1.122	1.545	0.858	0.346553
GLVSGGLYESHVGcRPY-P07858-C14(ywj)	0.684	0.705	0.767	0.0431548	1.16	1.126	0.967	0.103026	0.786	0.824	0.998	0.113037	0.852	1.145	0.922	0.153013	0.916	1.149	0.818	0.170026
YKPAVNQIEcHPY-P15121-C10(ywj)	1.085	0.836	1.032	0.131165	0.852	0.748	0.679	0.0870881	0.915	0.797	0.995	0.0996059	0.729	0.875	0.847	0.0774855	0.941	0.85	1.141	0.148863
HGLEVIYMIEPIDEYcVQQLK-P07900-C16(ywj)	0.91	0.819	1.221	0.210795	0.925	0.967	1.269	0.187663	0.917	0.83	1.092	0.13344	1.02	0.924	1.317	0.204888	0.918	0.932	1.127	0.116835
YPLVcIAK-P23141-C5(ywj)	1.25	1.275	1.137	0.0735278	1.004	1.237	1.026	0.128643	1.106	1.234	1.034	0.101298	1.135	1.028	0.999	0.071631	1.128	1.13	1.175	0.0265769
ESTLhLVLR-P0CG48-H5(ywj)	1.086	1.203	1.086	0.06755	1.091	1.119	1.117	0.0156205	0.944	1.006	0.886	0.0600111	0.939	0.88	0.829	0.0550485	1.208	1.078	1.078	0.0750555
ESLEhTLEETK-P35900-H5(ywj)	0.795	0.929	0.992	0.10061	0.887	0.929	1.056	0.0879905	0.828	0.824	0.927	0.0583467	0.607	0.883	0.648	0.148931	0.893	0.891	0.956	0.0369639
FLEGTScIAGVFVDATK-Q15149-C7(ywj)	1.087	1.018	0.652	0.233788	1	1.004	0.845	0.0906661	1.137	1.043	1.079	0.0474271	1.255	1.112	1.022	0.1175	0.67	0.925	0.503	0.212524
ALSDhHIYLEGTLLKPN-P04075-H5(ywj)	0.998	0.778	1.234	0.228047	0.94	1.197	0.899	0.161521	0.986	0.893	0.994	0.0561456	0.862	0.916	0.974	0.0560119	1.152	1.487	1.139	0.197272
NThIVISWMIAQTVTAVAGLTSYPFDTVR-P05141-H3(ywj)	1.383	0.458	1.099	0.473843	2.795	1.171	1.099	0.959077	2.216	1.227	0.841	0.709195	2.856	1.313	1.182	0.930975	1.233	1.257	0.98	0.153468
YKPVTNQVEcHPY-O60218-C10(ywj)	1.207	1.033	1.29	0.131158	0.823	1.111	0.835	0.162923	1.002	1.121	1.058	0.0595343	0.873	0.951	1.144	0.139507	1.082	1.048	1.081	0.0193477
VDNDENEhQLSLR-P06748-H8(ywj)	1.024	1.099	1.138	0.0579396	1.04	1.183	1.017	0.0899389	0.9	1.029	0.977	0.0649025	0.754	0.906	0.878	0.080895	0.829	1.056	1.158	0.168411
hGEVcPAGWKPGSDTIKPDVQK-Q06830-H1(ywj); C5(ywj)	1.175	0.744	0.986	0.216042	1.141	0.667	0.634	0.283671	1.277	0.922	0.948	0.197881	1.067	0.776	0.833	0.154211	0.998	0.98	1.041	0.0313422
NcSETQYESK-P61981-C2(ywj)	1.008	1.413	1.38	0.224907	0.9	0.769	0.938	0.0886623	0.967	0.68	0.782	0.145487	0.74	0.75	0.82	0.043589	0.858	0.955	0.96	0.0575007
hVLVTLGEK-P60660-H1(ywj)	0.968	1.259	0.937	0.177635	0.997	0.937	0.974	0.030271	0.783	0.974	0.863	0.0959184	0.831	0.856	0.813	0.0215948	1.083	1.199	1.161	0.0591383
AAVEEGIVLGGGcALLR-P10809-C13(ywj)	1.048	0.893	0.891	0.0900722	0.871	0.833	0.733	0.0712835	0.959	1.006	0.991	0.0240069	1.07	1.041	0.936	0.0705006	0.847	0.866	0.733	0.0719328
hEQEYMEVR-Q15363-H1(ywj)	1.107	1.391	1.053	0.181575	1.166	1.124	0.841	0.176766	1.014	1.019	0.828	0.108859	0.988	1.116	0.523	0.312052	1.195	1.138	0.937	0.135532
TYADYESVNEcMEGVcK-P84090-C11(Carbamidomethyl); C16(ywj)	0.962	1.215	1.235	0.152172	1.131	1.134	1.197	0.0372693	1.096	0.95	1.404	0.231767	1.166	0.792	1.116	0.20304	0.876	1.32	1.381	0.275645
LMcPQEIVDYIADK-O14561-C3(ywj)	0.889	0.935	0.958	0.0351331	1.089	0.936	0.925	0.0916752	1.051	1.11	0.983	0.0635531	1.013	1.097	1.137	0.0632877	1.086	1.003	0.863	0.112708
SLDLFNcEITNLEDYR-Q9BTT0-C7(ywj)	1.075	0.989	0.71	0.190815	0.823	0.753	1.181	0.229582	1.023	0.903	0.89	0.0733235	1.017	1.186	1.223	0.109823	1.019	0.597	0.925	0.221549
SVVLMShLGRPDGVPMPDK-P00558-H7(ywj)	1.221	0.906	1.161	0.167257	1.126	0.928	1.022	0.0990421	1.021	0.824	1.062	0.127236	0.992	0.762	0.819	0.119776	1.039	0.787	1.138	0.180972
FQSShHPTDITSLDQYVER-P14625-H5(ywj)	1.175	1.089	1.455	0.191377	1.278	1.653	2.114	0.418737	1.127	1.299	2.461	0.725647	0.997	1.017	2.493	0.858001	1.202	1.675	2.402	0.604464
GhLENNPALEK-P05388-H2(ywj)	1.559	0.989	1.492	0.311555	0.757	1.039	1.35	0.296618	0.849	0.735	0.9	0.0844808	0.744	0.793	0.874	0.0656531	1.026	1.262	1.52	0.247082
GTVVYGEPITASLGTDGShYWSK-Q16555-H19(ywj)	1.238	1.029	0.921	0.161159	1.193	1.151	1.116	0.038553	1.326	1.254	1.152	0.08743	1.186	1.149	1.049	0.0708731	1.327	0.863	0.86	0.268761
LILDVFcGSQMhFVR-P11413-C7(ywj); H12(ywj)	1.084	0.983	0.919	0.0831885	1.053	0.931	0.897	0.0820325	1.291	1.153	1.147	0.0814616	1.318	1.099	1.099	0.12644	1.235	0.849	1.038	0.193014
AIMPGQSYGLEDGScSYK-P14866-C15(ywj)	0.886	1.467	1.525	0.353376	1.333	1.061	1.069	0.154782	1.04	1.26	1.27	0.13	0.798	1.044	1.333	0.267788	1.196	1.211	1.31	0.0619435
ScSPELQQK-P16152-C2(ywj)	1.179	1.011	0.959	0.114984	0.77	0.785	0.989	0.12234	0.866	0.821	0.88	0.0308275	0.761	0.657	0.914	0.129276	0.899	0.901	0.997	0.0560119
SLLEGQEDhYNNLSASK-P08727-H9(ywj)	1.495	0.88	0.787	0.384738	1.002	0.479	0.957	0.289838	0.864	0.765	0.979	0.1071	0.822	0.728	0.953	0.113006	0.756	0.9	0.947	0.0995205
TVPIYEGYALPhAILR-P60709-H12(ywj)	1.063	0.945	1.175	0.115013	1.062	0.982	1.037	0.0409268	0.966	0.921	1.389	0.258192	1.135	0.951	1.196	0.127542	0.73	0.965	1.416	0.348622
WLPAGDALLQMITIhLPSPVTAQK-P13639-H15(ywj)	0.754	0.647	1.19	0.287632	1.121	1.21	1.01	0.100201	1.12	1.262	1.373	0.126816	1.312	1.464	1.571	0.13015	0.98	1.47	1.108	0.254142
ILDWhVANTDKK-P37837-H5(ywj)	1.051	1.173	1.087	0.0626844	0.889	1.016	1.349	0.237563	0.87	1.01	0.729	0.1405	0.792	0.875	0.8	0.0457857	1.111	1.226	1.078	0.0776938
ITIADcGQLE-P62937-C6(ywj)	0.951	0.909	0.923	0.0213854	0.832	0.881	0.896	0.0334714	0.922	0.937	0.937	0.00866025	0.764	0.885	0.848	0.0620027	0.851	1.024	1.071	0.115858
hGESAWNLENR-P18669-H1(ywj)	1.158	0.814	1.201	0.212114	0.923	0.646	1.23	0.292128	0.917	0.709	1.417	0.363897	0.774	0.57	1.069	0.250879	0.908	0.76	1.147	0.195275
EhLELFWSR-Q00610-H2(ywj)	1.011	0.943	1.166	0.114293	1.144	1.108	1.031	0.0577264	1.026	1.164	1.105	0.0692411	1.089	0.95	0.984	0.0724592	1.058	1.031	1.112	0.0412432
LIDLhSPSEIVK-P60866-H5(ywj)	1.129	1.102	1.113	0.0135769	1.184	1.083	1.158	0.0524436	1.018	0.867	1.095	0.115984	1.016	0.849	0.969	0.0861181	1.224	1.135	1.188	0.0447698
LLDIAcWIHHK-P07339-C6(ywj)	1.047	1.134	1.142	0.0526909	0.942	0.977	1.132	0.101119	0.932	0.901	0.997	0.0489932	1.058	0.918	0.99	0.0700095	0.89	0.831	1.026	0.100002
IWcFGPDGTGPNILTDITK-P13639-C3(ywj)	1.116	0.956	0.741	0.188171	1.493	1.118	1.027	0.247003	0.932	1.065	1.042	0.0710845	1.503	1.031	1.254	0.236119	1.649	1.271	1.121	0.272081
VcALLScTSHK-P15121-C2(ywj); C7(ywj)	1.136	1.089	1.09	0.0268514	0.637	0.677	0.678	0.023388	1.042	0.987	1.162	0.0894893	1.021	1.008	1.003	0.00929157	0.727	0.703	0.703	0.0138564
LDVMVSTFhK-P26447-H9(ywj)	1.253	1.182	0.956	0.155095	1.128	1.11	1.106	0.0117189	0.997	0.993	1.053	0.033546	0.994	0.945	0.956	0.0257099	1.175	1.248	1.019	0.11698
GFcYVEFDEVDSLK-Q15056-C3(ywj)	0.746	1.11	0.812	0.193931	0.911	0.99	0.777	0.107677	1.048	1.088	1.055	0.021362	1.036	1.135	0.999	0.070316	0.825	0.972	0.818	0.0869617
TDIQIALPSGcYGR-P33316-C11(ywj)	1.239	0.975	1.019	0.14144	0.834	0.948	0.511	0.226677	1.17	1.135	0.837	0.182993	1.243	0.827	0.782	0.254166	1.032	0.981	0.748	0.151408
MADTFLEHMcR-P14618-C10(ywj)	0.961	1.114	1.37	0.20665	1.045	0.94	1.234	0.148987	0.971	0.941	1.21	0.147412	1.044	0.923	1.234	0.156771	0.97	0.974	1.323	0.20266
ELWLVIhGR-O43169-H7(ywj)	1.103	0.925	1.194	0.136825	1.02	0.987	0.973	0.0241316	1.171	0.939	1.154	0.129317	1.22	0.921	1.107	0.150978	0.886	1.139	1.035	0.127165
FcLDNGAK-P00558-C2(ywj)	1.105	1.286	1.147	0.094733	1.016	1.02	0.962	0.0323934	0.987	1.044	0.896	0.0746481	0.885	0.88	0.865	0.0104083	1.04	1.139	0.863	0.139825
QFVVFEGNhYFYSPYPTK-P04843-H9(ywj)	0.665	0.927	0.57	0.184895	0.852	1.063	1.275	0.2115	0.996	1.135	1.597	0.314634	0.961	0.897	1.898	0.560367	0.835	0.945	0.693	0.126338
IcPVETLVEEAIQcAEK-P30084-C2(ywj); C14(ywj)	0.3	0.933	0.938	0.366915	0.778	1.325	1.079	0.27396	0.833	1.223	1.141	0.205624	0.92	1.074	1.055	0.0839663	1.151	1.215	1.241	0.0463177
TYGGcEGPDAMYVK-Q15369-C5(ywj)	1.121	1.271	0.75	0.268198	1.122	1.082	0.541	0.32451	1.092	0.981	0.842	0.125261	0.725	0.941	0.598	0.173414	0.957	1.03	0.914	0.058643
MIhILLYYK-O75832-H3(ywj)	0.972	1.075	0.929	0.0750267	0.933	0.987	1.013	0.0408085	0.953	1.037	1.188	0.119081	1.026	1.123	1.098	0.050362	0.927	0.869	0.889	0.0294618
HEQNIDcGGGYVK-P27797-C7(ywj)	1.026	1.218	1.091	0.0976542	0.878	1.168	1.067	0.147208	0.799	0.901	0.96	0.0814514	0.665	0.939	0.927	0.154846	1.029	1.108	1.152	0.0623244
VSQPIEGh-Q00610-H8(ywj)	1.154	1.009	1.068	0.0729178	0.952	0.915	0.864	0.0441852	0.897	0.95	0.773	0.0908424	0.838	0.812	0.863	0.0255016	1.13	1.105	1.069	0.0306649
EhINLGcDMDFDIAGPSIR-P21796-H2(ywj); C7(ywj)	1.233	0.955	1.034	0.143252	1.013	1.105	0.919	0.0930018	1.131	1.145	0.873	0.153158	1.101	0.828	0.959	0.136537	1.033	1.032	0.858	0.100749
VIQcFAETGQVQK-Q00610-C4(ywj)	1.146	0.7	0.858	0.226136	0.772	0.773	0.777	0.00264575	0.963	0.598	0.995	0.220552	0.882	0.981	0.916	0.0503024	1.007	0.938	0.988	0.0356417
YVATLGVEVHPLVFhTNR-P62826-H15(ywj)	0.984	1.422	0.943	0.265508	1.039	1.222	0.926	0.149373	1.06	1.001	1.017	0.0305123	1.089	1.092	1.133	0.0245832	1.032	1.265	0.884	0.192074
SNFAEALAAhK-P07237-H10(ywj)	1.16	1.093	1.128	0.0335112	0.991	1.158	0.978	0.100381	1.003	0.948	1.019	0.0372424	1.078	0.924	0.948	0.0828573	1.092	1.075	1.08	0.00873689
LcYVALDFEQEMATAASSSSLEK-P60709-C2(ywj)	0.573	0.709	0.77	0.100851	1.011	0.841	0.677	0.167009	0.997	0.829	0.993	0.095861	1.13	1.097	1.195	0.0498631	0.479	0.807	0.882	0.214328
TTGIVMDSGDGVThTVPIYEGY-P60709-H14(ywj)	1.312	1.31	1.059	0.145496	1.169	1.047	1.008	0.0839901	1.07	0.984	0.945	0.0639557	0.94	0.982	0.773	0.110555	0.984	1.139	0.872	0.134076
MSVIEEGDcK-P11216-C9(ywj)	0.984	1.216	0.943	0.147215	1.371	1.203	0.886	0.246285	1.037	0.983	0.858	0.0918168	1.172	0.856	0.788	0.204913	1.253	1.218	1.007	0.13308
FLSQPFQVAEVFTGhMGK-P06576-H15(ywj)	0.85	0.666	0.978	0.156835	0.905	0.763	0.811	0.0722311	1.203	0.831	1.118	0.194926	1.115	0.963	1.104	0.0847604	0.705	0.866	1.045	0.170079
GYLGPEQLPDcLK-P40926-C11(ywj)	1.317	1.012	0.986	0.184057	1.07	0.966	1.003	0.0527162	1.147	0.953	0.987	0.103595	1.196	1.145	0.982	0.111778	0.938	0.835	1.107	0.137328
EDEEESLNEVGYDDIGGcR-P55072-C18(ywj)	1.061	1.167	0.959	0.104006	1.004	1.133	0.893	0.120112	0.828	0.951	0.942	0.0685638	0.867	0.968	0.971	0.0591974	0.973	1.128	0.91	0.112189
TVYGGGcSEMLMAHAVTQLANR-P78371-C7(ywj)	0.684	0.709	0.913	0.12562	0.514	0.951	0.739	0.218532	0.912	1.013	0.756	0.129477	0.794	1	0.92	0.103852	0.729	1.007	0.762	0.151876
GcDVVVIPAGVPR-P40926-C2(ywj)	1.292	0.838	0.858	0.256538	1.012	0.697	0.817	0.158981	1.164	0.667	0.934	0.248729	1.205	0.808	0.975	0.199331	1.351	0.711	0.92	0.326354
hSVLLEIQK-Q9Y617-H1(ywj)	1.163	1.086	1.021	0.0710845	0.838	0.861	0.953	0.0608523	1.137	0.918	0.867	0.143447	0.93	0.836	0.883	0.047	1.075	1.02	0.967	0.0540031
PMcVESFSDYPPLGR-P68104-C3(ywj)	0.777	0.601	0.926	0.162687	0.775	0.832	0.951	0.0898016	1.046	0.769	0.875	0.139765	1.073	0.94	0.902	0.0897905	0.831	1	1.093	0.132824
RPPSAFFLFcSEHRPK-P26583-C10(ywj)	0.779	0.984	0.949	0.109659	1.069	0.931	0.965	0.0718981	0.956	1.028	1.046	0.0476235	1.042	0.99	1.029	0.0270617	0.977	0.983	0.948	0.0187172
IQFNDLQSLLcATLQNVLR-Q14974-C11(ywj)	0.928	0.808	0.879	0.0603352	0.683	0.817	0.902	0.11041	1.03	0.948	1.137	0.0947752	1.126	1.073	1.143	0.0365103	0.472	0.703	0.829	0.181055
DcGATWVVLGHSER-P60174-C2(ywj)	0.793	1.121	0.984	0.164739	1.07	1.035	0.985	0.04272	1.062	0.947	1.033	0.059808	1.015	1.023	1.037	0.0111355	1.152	1.071	0.938	0.108048
AVcMLSNTTAVAEAWAR-Q9BQE3-C3(ywj)	0.913	1.196	0.341	0.435564	0.905	1.08	1.034	0.0907212	1.018	1.078	0.892	0.0949316	1.078	1.204	0.722	0.249979	0.772	0.999	1.016	0.136231
EVIAVScGPAQcQETIR-P38117-C7(Carbamidomethyl); C12(ywj)	1.076	1.164	0.963	0.100759	1.086	0.721	0.351	0.367503	1.373	1.459	1.506	0.0674463	1.099	1.17	0.894	0.143319	1.8	1.08	0.866	0.489311
ATIAGGGVIPhIHK-P0C0S5-H11(ywj)	1.138	1.03	1.172	0.074144	0.891	1.112	1.093	0.122479	0.942	0.943	0.937	0.00321455	0.899	0.914	0.886	0.0140119	1.152	1.159	1.572	0.240492
SALSGhLETVILGLLK-P07355-H6(ywj)	1.099	1.018	0.781	0.165254	0.916	0.969	1.145	0.119879	0.953	0.813	1.263	0.23029	1.158	0.996	1.439	0.224148	1.109	0.917	1.124	0.115425
AWSTGDcDNGGDEWEQEIR-Q9BRF8-C7(ywj)	0.84	1.315	1.96	0.562146	0.761	1.155	1.591	0.415177	0.84	1.133	1.244	0.208721	0.7	1.056	1.445	0.372622	0.801	1.64	0.709	0.513021
YSPDcIIIVVSNPVDILTYVTWK-P07195-C5(ywj)	0.501	0.675	1.985	0.811237	1.05	1.071	1.126	0.0392471	0.978	1.128	1.098	0.0793725	1.091	1.046	1.105	0.0308275	0.831	0.64	0.944	0.153659
EELFQGDAFhQSDTHIFIIMGASGDLAK-P11413-H10(ywj)	0.589	0.907	0.792	0.161017	0.969	0.868	0.793	0.0883195	1.204	1.059	1.155	0.0737586	1.279	1.07	1.249	0.113006	0.936	0.952	0.835	0.0634376
SIcTTVLELLDK-P27348-C3(ywj)	1.089	1.083	1.232	0.0843465	1.091	1.073	0.972	0.0641431	0.948	1.24	1.285	0.182965	1.367	1.396	1.783	0.232259	0.967	1.191	0.856	0.170647
DLDANGDAQVDFSEFIVFVAAITSAcHK-P25815-C26(ywj)	0.645	0.528	0.389	0.128157	1.117	1.066	1.14	0.0378726	1.236	1.03	1.114	0.103582	1.505	1.577	1.614	0.0554286	0.921	0.733	1.06	0.164111
GNWGhLDQVAALR-P23141-H5(ywj)	0.985	0.943	0.955	0.0216333	0.88	0.98	0.95	0.051316	0.981	0.83	0.867	0.0787041	0.753	0.847	0.76	0.0523673	1.147	0.961	0.861	0.145139
GYDSAGVGFDGGNDKDWEANAcK-Q06210-C22(ywj)	0.348	0.776	0.94	0.305653	1.31	0.657	0.621	0.38782	1.128	0.69	1.1	0.245197	1.225	0.82	0.67	0.287098	0.847	0.955	0.731	0.112024
FQSSAVMALQEASEAYLVGLFEDTNLcAIHAK-Q71DI3-C27(ywj)	0.467	0.544	0.713	0.125835	1.1	0.605	0.562	0.298975	1.29	1.143	1.083	0.106504	1.726	1.077	1.35	0.325859	0.642	0.41	0.629	0.130355
hSQFIGYPITLYLEK-P08238-H1(ywj)	0.861	1.023	1.093	0.119001	0.805	1.015	0.916	0.105057	0.905	1.137	1.099	0.124435	0.935	1.191	1.089	0.128877	0.729	1.011	1.054	0.17654
FLDGNELTLADcNLLPK-O00299-C12(ywj)	0.788	1.207	1.304	0.274234	0.78	1.445	1.113	0.3325	0.783	1.361	1.132	0.291069	0.623	1.168	1.015	0.281098	0.396	1.238	0.999	0.433915
SSVPVSVVSDSYDIYNAcEK-P43490-C18(ywj)	0.805	0.801	1.51	0.408192	0.825	1.105	0.973	0.140076	0.852	1.354	1.285	0.272107	0.833	1.23	1.285	0.246623	0.905	1.105	1.165	0.136137
MVMTVFAcLMGR-P13797-C8(ywj)	0.839	0.877	0.886	0.0249466	0.96	1.115	1.035	0.0775134	1.157	1.187	1.395	0.12962	1.319	1.209	1.337	0.0692917	0.895	0.842	1.185	0.184643
hTVNYGSDLTGGGDLFVGNEK-P35900-H1(ywj)	1.203	1.224	0.633	0.335316	0.879	1.2	0.885	0.183622	0.947	1.008	0.803	0.105263	1.014	0.873	0.971	0.0722657	0.866	0.762	1.315	0.293889
GGDISVcEWYQR-P14854-C7(ywj)	0.848	1	0.907	0.0766312	0.912	1.114	1.092	0.110821	0.887	1.169	1.065	0.142609	0.907	1.203	1.026	0.148944	0.99	1.172	1.246	0.131742
hQYYNQEWTLWDR-P22314-H1(ywj)	1.058	1.032	0.945	0.0591805	1.167	0.694	0.961	0.237155	1.148	0.917	0.87	0.148803	1	0.793	0.983	0.114919	1.168	0.885	0.985	0.143514
DNEVDFQEYcVFLScIAM-P26447-C10(Carbamidomethyl); C15(ywj)	0.815	0.582	0.712	0.11676	0.977	0.834	0.529	0.22883	1.067	0.873	1.269	0.198013	1.172	1.05	1.215	0.085594	0.942	0.95	0.579	0.211925
KASDVhEVR-P14618-H6(ywj)	1.111	1.045	1.191	0.0731118	1.075	0.914	0.991	0.0805254	0.903	0.751	1.093	0.171351	0.761	0.744	0.873	0.070088	0.984	1.093	1.259	0.138481
AYEDGcK-P31948-C6(ywj)	1.249	1.355	1.102	0.127052	0.976	1.093	1.154	0.0904563	0.847	0.797	0.937	0.070946	0.857	0.86	0.845	0.00793725	1.139	1.39	1.245	0.126004
NVSVVDLTcR-P04406-C9(ywj)	0.952	1.216	1.21	0.150718	1.045	1.153	1.113	0.0546016	1.067	1.032	1.023	0.0232451	0.964	0.958	0.942	0.0113725	1.005	1.221	1.054	0.113245
NEAIQAAHDAVAQEGQcR-P09936-C17(ywj)	1.124	2.548	0.853	0.910517	0.953	1.501	1.136	0.278992	0.95	1.689	1.088	0.39293	0.862	1.246	1.099	0.19375	0.768	1.295	0.799	0.295721
EHINLGcDMDFDIAGPSIR-P21796-C7(ywj)	0.842	0.949	0.93	0.0570877	1.101	1.009	0.93	0.0855823	0.921	1.048	0.868	0.0925005	1.092	1.215	0.903	0.157159	1.22	1.191	0.816	0.225345
LLDIAcWIhHK-P07339-C6(ywj); H9(ywj)	1.099	1.089	1.106	0.008544	0.944	0.839	0.89	0.0525071	1.082	1.233	1.144	0.0759013	0.951	1.35	1.193	0.201003	0.983	1.008	0.968	0.0202073
YhTSQSGDEMTSLSEYVSR-P08238-H2(ywj)	1.026	1.073	1.104	0.0392726	1.083	1.043	0.741	0.186979	0.982	0.973	0.981	0.00493288	0.937	0.939	0.827	0.0640937	1.033	1.104	1.06	0.0358376
MGLGHEQGFGAPcLK-Q9UGI8-C13(ywj)	0.811	1.03	1.126	0.161453	0.987	1.122	1	0.0744737	0.841	1.253	0.987	0.208892	0.832	0.938	0.96	0.0684398	1.05	1.076	1.092	0.0211975
IEYNDQNDGScDVK-O75369-C11(ywj)	0.944	1.098	0.969	0.0826458	1.314	1.131	1.068	0.127785	0.91	0.811	0.617	0.149045	0.826	0.624	0.808	0.111791	1.378	0.527	1.037	0.428288
SAVENcQDSWR-P52209-C6(ywj)	1.126	1.023	1.068	0.0516366	1.035	0.976	1.24	0.138565	0.951	0.887	0.869	0.0430968	0.781	0.881	0.918	0.0708731	0.99	1.03	1.254	0.142286
ThILLFLPK-P07237-H2(ywj)	1.108	1.187	1.122	0.0421545	1.082	0.989	1.046	0.0468935	1.027	1.228	0.989	0.12843	0.872	1.041	1.094	0.115941	1.107	1.079	1.046	0.0305341
AVATVGPISVAIDAGhESFLFYK-P07711-H16(ywj)	0.745	1.175	0.803	0.233327	1.336	1.036	1.044	0.170942	0.947	0.994	1.074	0.0642106	1.033	1.138	1.247	0.107006	1.122	0.995	1.042	0.0642106
HEPIGVcGQIIPWNFPLVMLIWK-P00352-C7(ywj)	1.116	1.048	0.972	0.072037	1.045	1.043	1.178	0.0773714	1.31	1.283	1.111	0.107946	1.349	1.165	1.309	0.0967747	1.257	1.195	0.861	0.213001
LIccDILDVLDK-P62258-C3(ywj); C4(ywj)	1.423	1.055	1.724	0.335059	1.078	0.937	1.204	0.13357	1.175	0.905	1.33	0.215078	1.345	1.065	1.348	0.162531	1.164	1.06	1.212	0.0777003
DVIIADcGK-P23284-C7(ywj)	1.049	1.137	1.26	0.105983	0.887	1.047	1.088	0.106209	0.947	0.876	1.089	0.108454	0.907	0.842	1.021	0.0906109	0.985	0.993	1.134	0.0838113
hEPIGVcGQIIPWNFPLVMLIWK-P00352-H1(ywj); C7(ywj)	1.21	0.664	0.887	0.274522	1.261	0.97	0.812	0.227759	1.405	1.079	1.234	0.163065	1.347	1.233	1.227	0.0676166	1.106	0.798	0.964	0.154156
cPLLKPWALTFSYGR-P04075-C1(ywj)	0.924	0.812	1.074	0.131458	0.985	1.107	1.122	0.0751421	1.078	0.83	0.985	0.125285	1.066	1.19	1.116	0.0623859	0.978	0.935	0.934	0.0251197
HGYPLIIYDVFPDAcK-P31937-C15(ywj)	1.004	1.34	1.038	0.184958	0.94	1.156	1.108	0.11342	1.009	1.438	1.45	0.251219	0.963	1.301	1.231	0.178404	0.869	1.229	0.822	0.222657
LDPhNHVLYSNR-P31948-H4(ywj)	1.187	1.06	1.415	0.179879	1.314	0.992	1.08	0.166425	0.937	0.803	0.888	0.0678012	0.93	0.815	0.703	0.113503	1.271	1.036	1.247	0.129307
VDcTANTNTcNK-P30101-C3(Carbamidomethyl); C10(ywj)	1.157	1.403	1.83	0.340532	0.766	1.137	1.459	0.346789	0.785	1.073	1.299	0.257622	0.914	0.954	1.221	0.166902	1.172	1.29	1.148	0.0760088
LDQEDALLGSYPVDDGcR-Q99426-C17(ywj)	0.506	0.931	0.797	0.217279	1.272	1.027	0.9	0.189093	1.043	0.786	0.949	0.130035	0.982	1.003	0.873	0.0697878	1.24	0.936	0.893	0.189153
LVNhFVEEFK-P08107-H4(ywj)	1.172	1.096	0.739	0.231198	1.128	0.925	0.904	0.123711	0.928	1.006	0.882	0.0626844	0.821	0.882	0.984	0.0823549	1.269	1.114	1.025	0.123479
WLhNEDQMAVEK-P37837-H3(ywj)	1.063	0.88	0.887	0.103693	1.014	0.947	1.188	0.124396	1.088	0.669	0.972	0.216343	0.771	0.703	0.752	0.0350856	1.154	0.906	1.07	0.126132
LESGMQNMSIhTK-P05787-H11(ywj)	1.228	0.855	0.946	0.19448	1.126	1.037	0.971	0.0777839	0.975	0.836	0.931	0.0710422	0.917	0.825	0.773	0.07292	1.095	1.117	0.967	0.0810021
TIQFVDWcPTGFK-Q9BQE3-C8(ywj)	0.85	0.92	0.823	0.0500633	0.771	0.862	0.889	0.061825	0.812	1.07	0.964	0.129682	0.834	1.055	1.021	0.119	0.802	0.887	0.787	0.053929
VNPcIGGVILFhETLYQK-P04075-C4(ywj); H12(ywj)	0.963	0.51	0.976	0.265372	0.84	0.996	0.921	0.0780192	1.064	0.923	1.223	0.15009	1.205	1.067	1.244	0.093	0.833	0.672	0.888	0.112251
EQIVVDLShPGVSEDDQVSR-O60701-H9(ywj)	1.226	0.954	1.032	0.140062	1.023	0.994	1.193	0.107503	1.16	0.933	1.114	0.120004	0.929	0.816	0.927	0.064671	1.081	1.107	1.039	0.0343123
MDcQEcPEGYR-P21333-C3(ywj); C6(ywj)	1.057	1.208	1.009	0.103848	1.036	0.973	0.984	0.0336502	0.917	1.021	0.823	0.0990421	0.897	0.858	0.93	0.0360416	1.053	1.137	1.072	0.0440492
WNVLGLQGALLThFLQPIYLK-P55265-H13(ywj)	0.702	1.302	0.513	0.411955	1.214	1.213	0.959	0.146936	1.054	1.559	1.232	0.256137	1.102	1.243	0.929	0.157272	1.21	1.496	0.836	0.330976
hYGPGWVSMANAGK-P23284-H1(ywj)	1.163	0.786	1.212	0.233097	0.991	0.718	0.835	0.136963	1.033	0.734	0.816	0.154496	0.883	0.8	0.852	0.0419404	1.038	0.802	0.912	0.11809
VFANPEDcVAFGK-P10620-C8(ywj)	1.125	1.063	1.26	0.100729	1.003	1.06	1.113	0.0550121	0.917	1.033	1.149	0.116	0.81	0.969	1.24	0.217417	0.87	1.008	1.111	0.120923
GMYGIENEVFLSLPcILN-P07195-C15(ywj)	0.998	0.938	0.691	0.162715	0.904	0.905	1.064	0.0920887	0.779	0.696	0.872	0.0880473	0.969	1.037	1.063	0.0485386	0.509	0.803	1.298	0.398744
YADLTEDQLPScESLK-P18669-C12(ywj)	1.047	0.991	0.978	0.0366652	0.979	1.009	0.941	0.0340783	1.023	1.043	0.972	0.0366106	0.86	1.041	0.97	0.0911976	0.926	1.309	0.901	0.228684
DPYEAcDGAH-O60701-C6(ywj)	1.04	1.256	1.375	0.169824	1.057	1.47	1.25	0.206647	0.957	1.318	0.726	0.298369	0.851	1.083	0.889	0.124435	1.33	1.558	1.15	0.20447
GQDhcGIESEVVAGIPR-P07858-H4(ywj); C5(ywj)	0.683	1.124	1.001	0.227572	0.9	1.111	0.922	0.115993	1.054	1.102	0.819	0.151447	0.838	0.893	0.803	0.0453689	1.059	1.134	1.074	0.0396863
KhFVGYPTNSDFELK-Q14914-H2(ywj)	0.99	1.035	0.82	0.113395	1.05	0.969	0.803	0.125914	0.911	1.205	0.953	0.159009	0.847	0.936	0.649	0.146909	1.307	1.104	0.915	0.196042
FWEVISDEhGIDPTGTYhGDSDLQLDR-P07437-H9(ywj); H18(ywj)	0.652	0.884	1.23	0.290868	1.124	1.135	1.197	0.0393573	1.111	1.061	1.261	0.104083	0.813	0.988	0.884	0.088017	1.281	0.721	0.836	0.295762
hGLEVIYMIEPIDEYcVQQLK-P07900-H1(ywj); C16(Carbamidomethyl)	0.727	0.794	0.722	0.0402036	0.838	0.788	0.893	0.0525198	0.999	0.892	0.809	0.0952523	1.173	1.2	1	0.108519	0.906	1.017	0.649	0.188765
cVESFSDYPPLGR-P68104-C1(ywj)	0.855	0.87	0.824	0.0234592	0.754	1	1.014	0.146237	0.955	0.828	1.064	0.118114	0.973	0.948	0.914	0.0296142	1.055	0.921	1.025	0.0703231
IEGcIIGFDEYMNLVLDDAEEIhSK-P62304-C4(ywj); H23(ywj)	0.336	0.609	1.643	0.689436	0.987	0.953	1.617	0.373932	0.944	1.025	1.82	0.484073	1.128	1.392	1.622	0.247195	1.043	0.951	1.206	0.129137
ELEVQhPAAK-P50990-H6(ywj)	1.066	1.262	1.137	0.0992321	0.751	0.955	1.272	0.262534	0.927	1.013	1.087	0.080075	0.727	0.891	1.051	0.162004	1.033	1.359	0.874	0.247245
LQLQEQLQAETELcAEAEELR-P35579-C14(ywj)	0.858	0.634	0.706	0.114356	0.868	0.839	1.089	0.136737	0.977	0.83	1.09	0.13037	1.038	0.864	0.973	0.0879223	0.991	0.865	0.624	0.186479
TVYFAEEVQcEGNSFHK-P21291-C10(ywj)	0.869	0.949	1.126	0.131516	0.728	0.673	0.761	0.044456	0.849	0.768	0.826	0.0417413	0.818	0.929	0.8	0.0698642	0.837	0.904	0.996	0.0798269
VHSPSGALEEcYVTEIDQDK-P21333-C11(ywj)	0.9	0.821	1.016	0.0980833	1.113	1.046	0.764	0.185209	0.807	0.688	0.926	0.119	1.105	1.084	1.245	0.0875233	0.983	1.138	1.017	0.0814678
EDQSILcTGESGAGK-P35579-C7(ywj)	0.999	1.299	1.114	0.151355	1.167	1.261	0.791	0.248701	1.02	1.036	0.775	0.146289	0.945	0.958	0.687	0.152847	0.899	1.354	0.804	0.293981
VAAcELLHSMVMFMLGK-P78527-C4(ywj)	1.321	1.202	1.769	0.298986	1.661	0.806	0.674	0.53582	1.636	1.042	1.251	0.301314	1.842	1.221	1.338	0.329986	1.737	1.034	0.7	0.529329
hDLGHFMLR-P30043-H1(ywj)	0.99	1.029	1.12	0.0667108	0.813	1.047	0.951	0.117627	0.872	0.967	1.002	0.0672681	0.757	0.833	0.897	0.0700857	0.77	0.949	0.934	0.0992992
ScVEEPEPEPEAAEGDGDK-P51858-C2(ywj)	1	1.178	1.172	0.101081	1.148	0.791	0.998	0.179257	0.93	0.807	0.77	0.0837636	0.903	0.612	0.791	0.14678	0.91	0.863	1.026	0.0838987
HEcQANGPEDLNR-P60981-C3(ywj)	1.151	0.985	1.194	0.110368	1.133	0.769	0.654	0.250054	0.965	0.863	0.745	0.110097	0.885	0.818	0.812	0.0405257	1.3	1.122	0.962	0.16908
IhPVSTMVK-P07195-H2(ywj)	0.96	1.116	0.951	0.0927739	1.038	1.017	1.042	0.0134288	0.814	0.936	0.897	0.0623084	0.716	0.847	0.838	0.0731733	0.887	1.029	1.124	0.119274
EhFQDDVFNEK-P43490-H2(ywj)	0.991	1.01	1.016	0.0130512	1.254	1.139	1.099	0.0804674	1.25	0.842	0.962	0.209685	1.027	0.855	0.998	0.0920815	1.178	1.041	1.401	0.181704
LQAVTDDhIR-P30043-H8(ywj)	1.003	1.325	1.098	0.165448	1.018	0.975	1.025	0.027074	0.757	0.906	0.874	0.0784368	0.834	0.761	0.809	0.037099	0.925	0.837	1.011	0.0870019
AEFEVhEVYAVDVLVSSGEGK-Q9UQ80-H6(ywj)	0.955	0.898	1.217	0.170124	0.864	0.851	1.066	0.120553	0.984	1.015	1.303	0.17591	0.906	1.171	1.471	0.282681	1.087	1.33	1.195	0.12175
EhPWEVMPDLYFYR-P08865-H2(ywj)	0.841	0.831	0.934	0.0568008	0.884	0.795	1.078	0.14471	0.91	0.814	1.052	0.119739	0.852	0.879	1.027	0.0942143	0.717	0.851	0.936	0.11041
VQVQDNEGcPVEALVK-P21333-C9(ywj)	1.229	1.052	0.76	0.236838	1.027	1.044	0.912	0.0718076	1.122	0.898	0.89	0.131697	0.92	0.774	0.82	0.0746458	1.229	0.919	0.877	0.192253
GcITIIGGGDTATccAK-P00558-C2(Carbamidomethyl); C14(Carbamidomethyl); C15(ywj)	0.926	0.845	1.405	0.302655	0.783	1.008	1.319	0.269147	0.762	0.89	1.067	0.153155	0.76	0.862	1.203	0.231996	1.072	1.002	1.07	0.0398497
YWPQEAGEYAVHVLcNSEDIR-P21333-C15(ywj)	0.966	0.712	0.896	0.131195	0.908	1.025	1.123	0.10764	1.134	0.902	1.14	0.13571	1.138	0.982	1.232	0.126275	1.086	1.116	0.937	0.0958662
LVVVDFSATWcGPcK-P10599-C11(ywj); C14(Carbamidomethyl)	0.725	0.882	0.865	0.0861568	1.132	1.105	0.897	0.128594	1.136	1.124	1.064	0.0385746	1.332	1.315	1.098	0.13047	0.798	0.915	0.939	0.0754387
YKPAVNQIEcHPYLTQEK-P15121-C10(ywj)	1.141	0.974	1.172	0.1065	0.773	0.963	1.103	0.16563	0.866	0.802	1.177	0.2006	0.77	0.673	0.972	0.152542	0.9	1.002	1.005	0.0597746
IGLSVSEVIEGYEIAcR-P50990-C16(ywj)	0.843	0.671	0.513	0.165049	0.942	0.745	0.764	0.108669	1.38	0.922	0.95	0.256726	1.315	0.998	1.045	0.171074	0.751	0.827	0.816	0.0410731
SLNYWcNLLGMK-Q9HC38-C6(ywj)	0.959	0.849	1.151	0.152844	1.131	0.946	0.91	0.118576	1.288	1.062	1.143	0.1145	1.31	1.121	1.261	0.0980833	1.006	0.928	1.116	0.0944528
hSQFIGYPITLFVEK-P07900-H1(ywj)	0.819	1.037	0.845	0.119069	0.909	1.13	0.843	0.150314	1.007	1.091	0.945	0.0732757	1.06	1.186	1.074	0.0690604	0.962	1.184	0.836	0.176193
TVYALPTIAFAFVChPSVLPIYSELK-Q9H2H9-H15(ywj)	0.53	1.146	0.402	0.397781	0.638	0.993	0.862	0.179519	0.66	0.988	0.956	0.180842	1.041	0.973	1.294	0.169152	0.581	0.753	0.961	0.190284
LEcGGGPWGNK-P00352-C3(ywj)	0.973	1.154	0.961	0.108131	0.884	0.954	0.958	0.0416173	0.853	1.037	0.935	0.092181	0.808	0.848	0.971	0.084949	1.004	1.007	0.927	0.0453468
GhPSSPPVVDTVHGK-P23141-H2(ywj)	1.178	0.985	1.019	0.103026	1.095	0.723	0.791	0.198084	1.033	0.929	0.739	0.149082	0.801	0.971	0.849	0.0876432	1.346	0.942	0.957	0.229042
VAPEEhPVLLTEAPLNPK-P60709-H6(ywj)	1.084	0.921	0.973	0.0832606	1.184	0.917	1.265	0.182096	0.854	0.921	0.882	0.0336502	0.871	0.698	0.944	0.126342	1.022	0.871	1.419	0.283053
FLEMcNDLLAR-P34932-C5(ywj)	0.848	1.277	1.195	0.227733	0.912	0.927	1.063	0.0831885	0.928	0.908	1.006	0.0517816	0.951	1.072	1.012	0.0605007	0.854	1.199	1.018	0.17257
YDGhLPIEIK-P43490-H4(ywj)	0.958	0.94	0.925	0.0165227	0.83	1.046	0.915	0.108813	0.878	1.009	0.821	0.0963967	0.855	0.937	0.828	0.0567656	0.959	1.078	0.893	0.0937568
SQIhDIVLVGGSTR-P11142-H4(ywj)	1.211	1.631	1.222	0.239375	1.048	0.886	1.02	0.0865871	0.858	0.99	0.994	0.0773908	0.9	1.065	0.906	0.0935788	1.004	1.294	1.053	0.155232
FcFITFK-Q14103-C2(ywj)	1.206	1.212	1.146	0.0364966	0.762	0.707	0.848	0.0710657	1.292	0.91	1.031	0.195229	1.13	0.851	1.033	0.141642	1.727	1.012	1.638	0.389663
GIYAVGDVcGK-P00390-C9(ywj)	1.191	1.07	1.107	0.0620027	1.092	1.139	0.991	0.0756241	1.084	1.075	0.855	0.129693	1.008	1.1	0.835	0.134547	1.129	1.241	0.862	0.194711
EQcEQLEK-P07919-C3(ywj)	1.214	1.147	0.895	0.168203	0.967	1.096	1.071	0.068413	0.891	0.734	0.991	0.129549	0.843	0.704	0.622	0.111718	1.463	0.915	1.177	0.274088
IGAEVYhNLK-P06733-H7(ywj)	1.234	1.182	1.232	0.0294618	1.107	1.094	0.933	0.0969244	0.957	1.027	0.854	0.087023	0.817	0.86	0.743	0.0591805	1.165	1.12	1.075	0.045
AcPLDQAIGLLVAIFHK-P06703-C2(ywj)	1.026	0.908	0.653	0.190647	0.976	0.907	0.919	0.0368646	1.453	1.027	0.833	0.317152	1.311	1.048	1.241	0.136209	1.036	0.944	0.976	0.0467047
VIhDNFGIVEGLMTTVhAITATQK-P04406-H3(ywj); H17(ywj)	0.908	1.052	0.973	0.0721133	1.107	1.1	0.973	0.0754255	1.048	1.154	1.021	0.0703017	0.873	1.172	1.007	0.149768	0.624	1.026	0.966	0.216859
DELhIVEAEAMNYEGSPIK-P06748-H4(ywj)	1.183	1.005	0.725	0.230885	1.3	0.948	1.013	0.187305	1.111	1.017	0.942	0.0846778	1.304	0.905	1.213	0.209104	1.074	0.981	1.06	0.0501431
LGIWGFFSTGDEhSR-P23141-H13(ywj)	1.154	1.14	1.004	0.0828573	1.054	0.816	0.864	0.125862	1.123	0.899	1.001	0.112149	1.178	1.093	1.069	0.0572742	1.027	0.676	0.88	0.17627
RPPSAFFLFcSEYRPK-P09429-C10(ywj)	0.894	0.877	0.89	0.00888819	1.06	0.994	1.16	0.0835783	1.112	1.086	1.094	0.0133167	1.222	1.21	1.177	0.0233024	1.007	1.062	1.057	0.0304138
DPVPGYSVPAAEhSTITAWGK-P43490-H13(ywj)	1.368	0.965	0.849	0.272405	1.06	1	0.996	0.0358515	1.083	1.076	1.079	0.00351188	1.155	0.891	0.905	0.148544	1.022	1.011	1.137	0.0697878
GAVVGIDLGTTNScVAVMEGK-P38646-C14(ywj)	0.871	1.033	1.088	0.112811	1.007	1.007	0.94	0.0386825	0.888	1.23	1.026	0.172058	0.916	1.146	1.006	0.115902	0.838	0.878	0.895	0.0292632
FVEAEVPDVDLEcPDAK-Q09666-C13(ywj)	1.085	1.342	0.935	0.205831	0.924	1.143	1.075	0.112091	1.075	1.024	0.986	0.044658	0.944	1.035	0.889	0.073736	0.878	1.234	1.128	0.182789
LELLVGSPAScMELELYGVDDK-Q99426-C11(ywj)	0.786	1.122	1.183	0.213786	0.965	1.51	1.236	0.272501	0.995	1.29	0.83	0.233041	0.867	1.2	1.151	0.17979	0.716	1.794	1.161	0.541725
VVPGYGhAVLR-O75390-H7(ywj)	1.266	1.206	1.018	0.129388	0.916	0.967	0.92	0.0283608	0.974	0.824	0.884	0.0754983	1.034	0.975	1.005	0.0295014	1.13	1.114	0.832	0.167623
HDIIDDINSGAVEcPAS-P30050-C14(ywj)	0.737	0.839	1.161	0.221308	1.041	0.972	1.311	0.179156	1.069	1.091	0.84	0.139	1.156	1.195	1.077	0.0601193	1.012	1.072	0.991	0.0420357
VLSAPPhFHFGQTNR-P26641-H7(ywj)	1.071	1.126	1.352	0.148919	1.176	0.833	0.937	0.175872	0.902	0.896	1.072	0.0999266	0.972	0.934	0.786	0.0982717	1.346	0.911	1.075	0.219682
MVTPGHAcTQK-P04075-C8(ywj)	1.228	1.265	1.046	0.117228	1.034	1.144	0.78	0.186687	0.919	0.889	0.836	0.0420278	0.839	1.068	0.741	0.167816	0.937	1.521	0.851	0.364544
IISNAScTTNcLAPLAK-P04406-C7(ywj); C11(Carbamidomethyl)	0.776	0.885	1.035	0.13004	0.72	0.887	0.731	0.0934041	0.796	0.646	0.858	0.109002	0.801	0.894	0.718	0.0880473	0.836	0.792	0.829	0.0236432
NIHEScMSQIGWNR-P11413-C6(ywj)	1.076	1.074	0.849	0.130485	1.024	0.884	0.956	0.0700095	0.91	0.874	0.949	0.03751	0.75	0.829	0.799	0.039879	1.082	1.048	1.023	0.0296142
cPEALFQPSFLGMEScGIhETTFNSIMK-P60709-C1(Carbamidomethyl); C16(ywj); H19(ywj)	1.136	0.88	0.913	0.139256	1.387	0.847	0.867	0.306159	1.493	1.028	1.143	0.242195	1.588	0.965	1.073	0.332921	1.073	0.971	0.967	0.0600777
SYPLVcIAK-P23141-C6(ywj)	0.922	1.109	0.76	0.174649	1.08	0.95	1.132	0.0937443	1.062	0.997	1.056	0.0359212	0.908	0.902	0.886	0.0113725	0.932	1.141	1.11	0.112787
ITScIFQLLQEAGIK-P22234-C4(ywj)	0.835	0.387	1.365	0.489573	0.772	0.981	1.432	0.337313	1.108	1.204	1.56	0.238137	1.122	1.321	1.773	0.333593	1.17	1.1	1.762	0.363687
VNFHFILFNNVDGhLYELDGR-P09936-H14(ywj)	0.899	0.607	0.751	0.146005	1.323	1.009	1.154	0.157153	1.196	1.12	1.1	0.0506491	1.477	1.076	1.26	0.200726	1.185	0.86	1.026	0.162513
VTLADITVVcTLLWLYK-P26641-C10(ywj)	1.1	0.896	1.062	0.108487	1.338	0.805	1.104	0.26716	1.326	0.901	1.137	0.212933	1.603	1.516	1.288	0.162675	1.273	1.141	1.012	0.130503
DFSAFINLVEFcR-P78527-C12(ywj)	0.934	0.908	0.329	0.342038	1.313	0.874	0.925	0.240092	1.196	1.23	0.9	0.181508	1.237	1.201	1.481	0.152333	1.2	1.257	0.51	0.415804
VIFDIVDLcTTWEAMEK-P42330-C9(ywj)	0.652	0.866	1.193	0.27246	0.901	1.212	1.16	0.166586	1.211	1.2	1.486	0.16204	1.234	1.27	1.635	0.221857	1.128	0.878	1.043	0.127115
TIAEcLADELINAAK-P46782-C5(ywj)	0.996	1.024	0.824	0.108296	1.027	1.213	1.071	0.0972077	0.78	1.056	1.083	0.167687	0.862	1.205	1.183	0.191996	0.663	1.127	0.92	0.232449
hEPIGVcGQIIPWNFPLVMLIWK-P00352-H1(ywj); C7(Carbamidomethyl)	0.85	0.932	1.209	0.18812	1.154	1.001	1.161	0.0904231	1.437	1.116	0.956	0.24495	1.333	1.412	1.453	0.0609945	1.059	1.109	0.927	0.0940284
DASIVGFFDDSFSEAhSEFLK-P30101-H16(ywj)	0.968	0.763	0.629	0.170735	1.122	1.509	0.817	0.346809	1.023	1.198	0.967	0.1205	0.892	0.786	0.898	0.0630026	1.094	0.984	1.004	0.0585947
GEMMDLQhGSLFLQTPK-P07195-H8(ywj)	0.869	0.813	1.106	0.155539	1.186	1.194	1.053	0.0791981	1.055	0.946	1.05	0.0615386	0.919	0.934	0.928	0.00754983	1.062	0.927	1.073	0.081304
TVEAEAAhGTVTR-O75874-H8(ywj)	1.216	1.152	1.051	0.0831885	1.178	1.018	0.818	0.18037	1.042	1.145	0.491	0.351645	0.887	0.644	0.609	0.151414	1.269	1.204	0.78	0.265557
AILGVSLAVcK-P06733-C10(ywj)	1.023	1.132	0.793	0.173062	1.01	1.139	0.881	0.129	1.19	1.096	0.989	0.10057	1.068	1.208	1.016	0.0993042	1.018	0.951	0.822	0.0996209
AVLFcLSEDKK-P23528-C5(ywj)	1.119	1.258	0.858	0.203077	0.734	0.849	0.854	0.0678847	1.031	0.917	0.853	0.0901628	0.96	0.996	0.798	0.10547	1.044	0.892	0.924	0.0801332
QSVELcK-Q00610-C6(ywj)	1.072	1.005	1.064	0.0365923	0.847	0.879	0.982	0.0705431	0.839	0.801	0.939	0.0712835	0.776	0.723	0.842	0.0596182	0.871	0.952	1.064	0.0969141
SAFPFELLhTPEK-P07099-H9(ywj)	0.996	1.269	1.123	0.13661	1.148	0.971	0.962	0.104886	1.009	1.196	1.163	0.0998115	1.109	1.177	1.069	0.0546016	1.198	0.999	1.043	0.104532
TTGIVMDSGDGVThTVPIYEGYALPH-P60709-H14(ywj)	1.225	0.956	1.004	0.143472	1.15	1.016	1.098	0.0675574	1.058	1.021	0.959	0.0500233	0.883	0.919	1.039	0.0816823	1.292	0.844	1.039	0.224625
TSYGWIEIVGcADR-P41250-C11(ywj)	0.916	0.912	0.889	0.0145717	1.109	1.057	0.8	0.165446	1.246	1.078	1.017	0.118593	1.34	1.2	1.099	0.121025	1.023	0.905	0.979	0.0596322
FVDVLGLEEESLGSVPAPAcALLLLFPLTAQHENFR-P09936-C20(ywj)	1.325	1.289	0.614	0.400508	2.219	0.56	1.759	0.856493	2.576	1.385	1.63	0.628944	3.022	1.634	1.851	0.746645	1.387	1.142	1.012	0.190416
hQAQIDhYLGLANK-Q9NQC3-H1(ywj); H7(ywj)	0.991	1.444	1.101	0.236276	0.952	0.975	0.903	0.0367741	0.995	1.527	1.135	0.275768	0.773	1.619	1.03	0.433721	0.774	1.51	0.805	0.41627
DVMVSTFhK-P26447-H8(ywj)	1.293	1.143	1.074	0.111969	0.845	0.971	0.958	0.0692989	0.815	0.885	0.849	0.0350048	0.724	0.782	0.916	0.098475	1.147	0.974	0.966	0.102269
PLLMVhGWPGSFYEFYK-P07099-H6(ywj)	0.972	0.675	0.858	0.14983	0.774	1.057	0.739	0.174374	1.247	1.076	0.885	0.181092	1.109	1.048	1.199	0.0759627	0.922	0.99	0.707	0.147726
IDFEDVIAEPEGThSFDGIWK-Q03135-H14(ywj)	0.714	0.754	0.817	0.0519262	1.093	1.029	1.154	0.062506	0.751	1.046	1.262	0.256516	1.114	1.023	1.366	0.177686	0.791	1.184	1.216	0.236678
LQMEAPhIIVGTPGR-P60842-H7(ywj)	1.097	1.195	0.821	0.193931	0.915	1.019	1.209	0.149082	0.924	1.041	0.843	0.099544	0.843	1.023	0.701	0.161373	1.093	1.246	0.874	0.186973
TQLGAIYIDAScLTWEGQQFQGK-P61970-C12(ywj)	0.762	0.81	1.08	0.171429	0.918	0.595	1.334	0.370474	0.816	0.76	1.124	0.196	1.199	0.95	1.277	0.170789	0.999	0.833	1.021	0.102781
YVEPIEDVPcGNIVGLVGVDQFLVK-P13639-C10(ywj)	1.024	0.387	0.929	0.343647	1.054	0.984	1.006	0.0357957	0.906	1.049	1.122	0.109874	0.959	1.145	1.239	0.142497	0.838	0.937	0.986	0.0753945
RHIDCAYVYQNEhEVGEAIQEK-O60218-H13(ywj)	0.788	0.679	1.004	0.16541	0.761	0.664	0.936	0.137851	0.814	0.714	0.682	0.0688573	0.858	0.841	0.992	0.0827103	0.501	0.913	0.429	0.261146
YDDMAAcMK-P63104-C7(ywj)	1.093	1.145	1.137	0.028	1.01	1.133	0.953	0.0919946	0.978	0.964	0.882	0.0518588	0.916	0.852	0.833	0.0434856	1.131	1.13	1.077	0.0308923
DLDANGDAQVDFSEFIVFVAAITSAchK-P25815-C26(ywj); H27(ywj)	0.602	1.203	0.688	0.325018	1.222	1.138	1.092	0.0659191	1.067	1.298	1.299	0.133658	1.52	1.217	1.638	0.217169	0.865	1.005	0.87	0.079425
hLNEIDLFHcIDPNDSK-Q15185-H1(ywj); C10(ywj)	0.828	1.004	1.014	0.10462	0.846	1.057	1.02	0.112669	1.017	0.93	0.947	0.0461122	0.923	0.901	0.905	0.0117189	0.906	1.186	0.865	0.174701
FShEEIAMATVTALR-P04075-H3(ywj)	1.176	1.386	1.144	0.131458	1.056	1.061	0.977	0.0471204	1.101	0.923	0.976	0.0913947	1.015	1.051	1.049	0.020232	0.938	0.899	1.029	0.0667108
LANSLAcQGK-P04075-C7(ywj)	1.174	1.009	1.198	0.102893	1.04	0.869	1.03	0.0959705	0.952	0.855	0.841	0.0604511	0.849	0.735	0.785	0.0571431	1.115	1.189	1.085	0.0535288
VhLVGIDIFTGK-P63241-H2(ywj)	1.395	0.9	1.07	0.251512	1.272	0.91	0.772	0.258227	1.358	0.902	0.904	0.262696	1.346	0.966	0.95	0.224155	1.235	0.873	1.053	0.181001
YSIAITWGGhHIPK-O75369-H10(ywj)	1.093	0.916	0.884	0.112571	1.081	0.982	0.853	0.114328	0.946	0.873	0.88	0.0402782	1.008	0.872	0.84	0.0892039	1.184	0.776	0.988	0.204052
LIQYcQSK-P15121-C5(ywj)	1.347	1.099	1.16	0.129225	0.869	0.838	1.067	0.124235	1.073	0.912	1.018	0.0818352	0.89	0.826	0.87	0.0327414	1.139	0.746	1.032	0.203181
hTAAPTDPADGPV-Q04941-H1(ywj)	0.739	0.938	0.935	0.114037	0.877	0.889	1.066	0.105825	0.924	0.715	1.179	0.23238	0.908	0.706	0.981	0.142454	0.792	1.082	1.16	0.193911
AVTEQGhELSNEER-P31946-H7(ywj)	1.287	1.071	1.525	0.227089	0.819	1.135	1.107	0.174921	0.978	0.84	1.363	0.271047	0.849	0.787	1.1	0.165738	1.402	0.978	0.876	0.278943
VGTGEPccDWVGDEGAGhFVK-P52209-C7(Carbamidomethyl); C8(Carbamidomethyl); H18(ywj)	1.015	0.836	1.311	0.23989	0.606	1.2	1.032	0.306196	0.606	0.897	1.146	0.270272	0.914	0.975	0.836	0.069673	0.997	1.598	1.279	0.30069
YYVTIIDAPGhR-P68104-H11(ywj)	1.005	1.112	1.023	0.0572917	1.023	1.076	0.922	0.0782368	0.873	0.981	0.818	0.0829237	0.888	0.942	0.921	0.0272213	1.003	1.119	1.103	0.0628649
hFVALSTNTTK-P06744-H1(ywj)	1.112	0.858	1.291	0.21758	0.897	0.69	0.909	0.123122	1.123	0.86	1.003	0.131668	1.047	0.614	1.007	0.239283	1.314	0.865	0.989	0.231877
EDLNcQEEEDPMNK-O75821-C5(ywj)	0.969	0.741	1.084	0.174575	1.247	0.754	1.182	0.267849	1.168	0.738	1.106	0.232439	1.206	0.484	0.639	0.380087	1.044	0.71	1.192	0.246909
ILYSQcGDVMR-P60660-C6(ywj)	1.128	1.036	0.886	0.122153	0.981	1.027	0.771	0.136475	0.93	0.835	0.873	0.0478156	0.861	0.754	0.799	0.0537246	0.873	1.012	0.993	0.075368
YTPSGQAGAAASESLFVSNhAY-P04075-H20(ywj)	1.426	0.919	0.937	0.287661	1.603	0.989	0.996	0.35249	1.283	0.824	0.918	0.242467	1.322	1.009	0.938	0.204314	1.271	1.162	1.074	0.0986864
	median=1.016, SD=0.135				median=0.994, SD=0.108				median=0.989, SD=0.110				median=0.971, SD=0.098				median=1.008, SD=0.121
